# Supplementary material
Source: PubMed Central journal article supplement (PMC3666672)
Supplement: 1219283110_sapp.pdf [file 1219283110_sapp.pdf]

## Supporting Information

### Evolution of the plankton paleome in the Black Sea from the Deglacial to Anthropocene

Marco J.L. Coolen<sup>1\*</sup>, William Orsi<sup>2</sup>, ChereI Balkema<sup>1</sup>, Chris Quince<sup>3</sup>, Keith Harris<sup>3</sup>, Sean Sylva<sup>1</sup>,  
Mariana Filipova-MarinoVA<sup>4</sup>, Liviu Giosan<sup>2</sup>

<sup>1</sup> Marine Chemistry and Geochemistry Department, Woods Hole Oceanographic Institution, Woods Hole, MA 02543, USA, <sup>2</sup> Geology and Geophysics Department, Woods Hole Oceanographic Institution, Woods Hole, MA 02543, USA, <sup>3</sup> School of Engineering, Glasgow University, Glasgow, G128LT, United Kingdom, <sup>4</sup> Varna Regional Museum of History, 9000 Varna, Bulgaria.

## MATERIAL AND METHODS

### Sedimentary materials and age models.

The sedimentary ancient plankton DNA (fossil plankton DNA), geochemical, and molecular isotopic datasets presented in this study are stemming from the upper 185 cm of Giant Gravity Core GGC18. The upper 125 cm of the same GGC18 and same depth intervals (one-cm sampling resolution throughout Unit I, Unit II) was previously used for a fossil DNA and lipid biomarker survey to reconstruct the Holocene succession of haptophyte algae as sources of fossil alkenone lipid biomarkers (1), and to reconstruct viral infection of past *E. huxleyi* populations (2). For this study we included nine one-cm intervals from the lacustrine/low salinity Unit III-C1 section (9.4-11.4 ka cal BP) and nine one-cm intervals from the gray-green T section (7.5-9.4 ka cal BP; subsampled at one-cm resolution). Briefly, GGC18 was recovered from a water depth of 971m in the western basin of the Black Sea (42°46.569'N:28°40.647'E) during cruise AK06 on the R/V *Akademik* (Institute of Oceanology, Bulgarian Academy of Sciences; IOBAS) in September 2006. Radiocarbon dating of bulk organic matter (1) revealed that the top 8 cm was not recovered through gravity coring. However, undisturbed cores of top laminated sediments, including the top fluffy layer, were obtained at the same location using a MC800 multicorer (Ocean Instruments, San Diego, CA). The core length of the resulting multicore 19 (MC19) and GGC18 combined used for molecular isotopic and fossil DNA analysis was 193 cm. Detailed sampling procedures including precautions taken to prevent (cross) contamination with foreign

DNA can be found elsewhere (1). Calibrated radiocarbon dates from both cores have been used to derive the simplest age model (3). Briefly, a quadratic function of the corrected depth was used for the interval between 0 and 124 cm corrected depth:  $Age = 0.1733*(corrected\ depth)^2 + 37.216*(corrected\ depth), \quad r^2 = 0.9958$ .

Corrected depth refers to depth of samples in GGC18 to which 8 cm was added to compensate for the lost core top; no correction is applied to depths of samples from MC19. Sedimentation rates between 124 and 8,944 cal. years BP are low and, thus, interpolation between the calibrated radiocarbon dates corresponding to these depths was used to derive each sample age from that interval (3). For this study, the age model was extended into the deglacial with two dates on micro-gastropod shells. These radiocarbon dates were calibrated using the marine reservoir age based on the latest information that between 8000 and 11,500 years BP the Black Sea-Lake reservoir age was between 300 and 500 years (4). In addition, the archived core half was digitally photographed, subjected to X-radiography, and scanned for bulk elemental composition using an ITRAX<sup>TM</sup> micro-XRF scanner as described previously (1). The XRF measurements were performed using a molybdenum x-ray tube at an exposure time of 10 sec per measurement and a step-size of 200  $\mu$ m to allow for analysis of bulk chemistry at lamina and intra-lamina scales. The downcore variability in calcium was used herein to further characterize the core lithostratigraphy (4).

### **Lipid geochemistry and hydrogen isotope analysis (salinity proxy).**

Total organic carbon (TOC) analysis, extraction of alkenones and compound identification from 21 freeze-dried one-cm sediment intervals of core GGC18 and MC19 compound identification and subsequent determination of *D/H* alkenone ratios from 21 sediment intervals aging between 6.6 and 0.8 ka cal BP has been described in detail elsewhere (1, 3).

### **Fossil plankton DNA**

#### *Extraction of sedimentary DNA*

For this study, total DNA was extracted from 8-10 gram of wet weight sediment from the nine Unit III-C1 and nine Unit III-T one cm intervals using the PowerMax<sup>TM</sup> Soil DNA Isolation Kit (Mobio, Carlsbad, CA). The same approach was used previously to extract DNA at 1 cm resolution from the marine Unit I and II sediments of GGC18, which served for the



reconstruction of haptophyte algae (1) and their associated viruses (2). The concentration of extracted DNA was quantified with the fluorescent dye PicoGreen (Molecular Probes). Genomic DNA extracted from all 136 sediment intervals spanning the last 11,400 years of deposition served as template for the targeted PCR/DGGE/capillary sequencing approach to reconstruct past copepod species as independent proxies for SSS changes. Genomic DNA of 48 out of 144 sediment intervals served as template for 18S rDNA amplicon sequencing (pyrotag sequencing) (5) using the Roche 454 GS FLX platform (6) to reconstruct the overall past plankton dynamics.

*Fossil copepod 18S rDNA: group-specific PCR/DGGE/Sanger sequencing.*

Partial copepod 18S rDNA (317 bp) was amplified with the general eukaryote primer EukA (7) and a novel copepod-specific reverse primer Cop317r (5'-TTG ATA GGG CAC ACC TTC-3'). Final primer concentrations were 0.25  $\mu$ M. All reactions were performed in a Masterplex PCR cyclor (Eppendorf). Each amplification reaction contained 0.25 mM of each deoxynucleotide (dNTP), 1.5 mM of MgCl<sub>2</sub>, 50  $\mu$ g of BSA (Ambion), 5  $\mu$ l of 10 x PicoMaxx™ reaction buffer (Stratagene, LaJolla, CA), 2.5 units of DNA polymerase (PicoMaxx™ high fidelity PCR system; Stratagene), 0.2  $\mu$ M of primers (Thermo-Fisher, Ulm, Germany), and 10 ng of DNA template. The reaction mixtures were adjusted to a final volume of 50  $\mu$ l with nucleic acids and nuclease-free water (Ambion). Pipetting of the initial PCR mixtures were performed inside our ancient DNA-dedicated clean lab with all necessary precautions to prevent contamination of the reactions with foreign DNA as described recently (1). All PCR reactions also involved controls for contamination during pipetting of the reactions and for contamination during extraction and purification of DNA (1).

In order to minimize the formation of primer dimers, the copepod amplicons were generated in two steps. The first round of PCR involved a standard initial denaturing followed by 32 cycles including denaturing (30 s at 94°C), primer annealing (60 s at 61.5°C), and primer extension (60 s at 72°C). A final extension was set to 10 min at 72°C. The GC-clamp for subsequent DGGE analysis was incorporated by subjecting 1  $\mu$ l of the amplicons ( $\sim 10^7$  copies) to a second round of PCR with 12 cycles and 0.25  $\mu$ M of primers EukA and GC-Cop317r (5'CGC CCG CCG CGC CCC GCG CCC GGC CCG CCG CCC CCG CCC CTT GAT AGG GCA CAC CTT C-3'). The underlined sequence in primer GC-Cop317r represents the 40-bp-long GC clamp, which is required to prevent complete melting of the amplicons during DGGE (8). The reverse primer for

copepods was designed for this study based on aligned 18S rDNA sequences available through the SILVA database (9) and by using the Probe\_Design tool implemented in the phylogenetic tree program ARB (10).

The above PCR products were separated based on genus to species-level variations in the nucleotide positions by DGGE (8). The polyacrylamide gels (6%, wt/vol) contained a denaturing gradient of 20 to 50% (with 100% denaturant equaling 7M urea and 40% formamide) for both copepod and haptophyte 18S rDNA. Gels were run for 15 h at 120 V (5 V.cm<sup>-1</sup>) at 60°C using a PhorU2 system (Ingeny, Leiden, Netherlands). DGGE bands were excised from the gel and prepared for subsequent cycle sequencing (1) using the facilities of Beckman Coulter Genomics. The partial copepod 18S rDNA sequences were automatically aligned against the SILVA release 111 eukaryote database (9), analyzed for the presence of chimeras, and unique OTUs were identified (97% sequence identity threshold) using MOTHUR (11). The most similar sequences of the seven resulting OTUs were identified through a BLAST (12) search in the National Center for Biotechnology Information non-redundant (NCBI nr) database (<http://www.ncbi.nlm.nih.gov/>).

*Reconstruction of the overall eukaryotic plankton composition (pyrotag sequencing).*

Partial (563 bp-long) environmental eukaryotic 18S rRNA gene fragments (V1V3 region) were amplified by PCR from the fossil DNA pool of the 48 selected sediment intervals spanning the last 11.4 kyr of the Black Sea's history. The same primer combinations (Table 1), additional PCR reagents, as well as PCR conditions to generate template DNA for subsequent multiplexed pyrotag sequencing (5) using Roche 454 titanium chemistry (6) were recently used to reconstruct the relative abundance of past dinoflagellates and diatoms in the GGC18 and MC19 samples (3). The concentration of each barcoded amplicon was determined using picogreen, and 600 nanograms of fifteen uniquely barcoded amplicons were pooled and purified as described recently (3). A total of 3 µg of purified template DNA (i.e., comprising a mixture of 15 barcoded amplicons at 200 ng per barcoded amplicon) was subjected to Roche 454 GS FLX Titanium pyrotag sequencing using the facilities of Engencore (Columbia, SC).

| Primer name    | 1st PCR: with general eukaryote 18S rDNA primers, 5' – 3' orientation                           |
|----------------|-------------------------------------------------------------------------------------------------|
| EukA           | ACC TGG TTG ATC CTG CCA GT                                                                      |
| Euk516r        | ACC AGA CTT GCC CTC C                                                                           |
|                | 2nd PCR: with barcode 454 fusion forward primers (pyrosequencing template), 5' – 3' orientation |
| fpA_MID1_EukA  | CGTATCGCCTCCCTCGCGCCATCAGAC <b>CGAGT</b> <u>GCGT</u> ACCTGGTTGATCCTGCCAGT                       |
| fpA_MID2_EukA  | CGTATCGCCTCCCTCGCGCCATCAGAC <b>CGCT</b> <u>CGACA</u> ACCTGGTTGATCCTGCCAGT                       |
| fpA_MID3_EukA  | CGTATCGCCTCCCTCGCGCCATCAGAG <b>ACGCACT</b> <u>C</u> ACCTGGTTGATCCTGCCAGT                        |
| fpA_MID4_EukA  | CGTATCGCCTCCCTCGCGCCATCAGAG <b>CACTG</b> <u>TAG</u> ACCTGGTTGATCCTGCCAGT                        |
| fpA_MID5_EukA  | CGTATCGCCTCCCTCGCGCCATCAGAT <b>CAGAC</b> <u>ACG</u> ACCTGGTTGATCCTGCCAGT                        |
| fpA_MID6_EukA  | CGTATCGCCTCCCTCGCGCCATCAGAT <b>ATCG</b> <u>GAG</u> ACCTGGTTGATCCTGCCAGT                         |
| fpA_MID7_EukA  | CGTATCGCCTCCCTCGCGCCATCAG <b>CGTGTCT</b> <u>CTA</u> ACCTGGTTGATCCTGCCAGT                        |
| fpA_MID8_EukA  | CGTATCGCCTCCCTCGCGCCATCAG <b>CTCG</b> <u>GTGTC</u> ACCTGGTTGATCCTGCCAGT                         |
| fpA_MID10_EukA | CGTATCGCCTCCCTCGCGCCATCAG <b>TCTCT</b> <u>ATG</u> CGACCTGGTTGATCCTGCCAGT                        |
| fpA_MID11_EukA | CGTATCGCCTCCCTCGCGCCATCAG <b>TGATA</b> <u>CGTCT</u> ACCTGGTTGATCCTGCCAGT                        |
| fpA_MID13_EukA | CGTATCGCCTCCCTCGCGCCATCAG <b>CATAG</b> <u>TAGT</u> GACCTGGTTGATCCTGCCAGT                        |
| fpA_MID14_EukA | CGTATCGCCTCCCTCGCGCCATCAG <b>CGAGAG</b> <u>ATAC</u> ACCTGGTTGATCCTGCCAGT                        |
| fpA_MID15_EukA | CGTATCGCCTCCCTCGCGCCATCAG <b>ATAC</b> <u>GACGTA</u> ACCTGGTTGATCCTGCCAGT                        |
| fpA_MID16_EukA | CGTATCGCCTCCCTCGCGCCATCAG <b>TACG</b> <u>TACTA</u> ACCTGGTTGATCCTGCCAGT                         |
| fpA_MID17_EukA | CGTATCGCCTCCCTCGCGCCATCAG <b>CGTCT</b> <u>AGTAC</u> ACCTGGTTGATCCTGCCAGT                        |
|                | 454 fusion reverse primer (5'-3' orientation):                                                  |
| fpB_Euk516r    | CTATGCGCCTTGCCAGCCCGCTCAGACCAGACTTGCCCTCC                                                       |

**Supporting Table S1.** Primers used for Roche 454 pyrosequencing of PCR-amplified fossil 18S rRNA genes. fpA (454 fusion primer A sequence), MID (10-bp barcode sequence in **bold**), EukA (7) (forward primer sequence for general eukaryote 18S rDNA underlined). fpB (454 fusion primer B sequence), Euk516r (13) (reverse primer sequence for general eukaryote 18S rDNA ).

*Pyrotag data processing and statistical analysis.*

The corresponding fasta and qual files from the 454 pyrosequencing run and an associated mapping file that contained the names and corresponding barcode-primer sequences of the multiplexed samples were uploaded via the PyroTagger pipeline (<http://pyrotagger.jgi-psf.org/>) (14). Using Pyrotagger, reads were removed that, at a given read length, had >3% of bases with Phred values <27 (0.2% per-base error probability) to ensure that 97% clustering absorbed all erroneous reads. This user-defined length was in our case set to 360 bp (i.e., length-trimming), and shorter sequences were disregarded, followed by dereplication and clustering at 97% sequence identity threshold with the most abundant unique sequence serving as a cluster representative. Representative sequences from each cluster were classified by comparison to the SILVA database for eukaryotes (9). The current version of PyroTagger uses BLASTn (12) to

identify the top hit and its associated taxonomy for each 97% cluster representative. Classified reads were separated into their respective samples using the barcodes provided in the original mapping file. Putative chimeric sequences were identified as having a best BLAST alignment <90% of the trimmed read length to the reference database, >90% sequence identity to the best BLAST match and cluster size  $\leq 2$ .

Non-metric multidimensional scaling (NMDS) and permutational multivariate analysis of variance were performed using the *vegan* package in R. In both cases the Bray-Curtis distance metrics was used to define dissimilarity between communities. The *metaMDS* function was used for NMDS, this employs multiple random starting configurations and selects the result with the lowest stress values. To determine the impact of the environmental stages on the community configurations, a permutational multivariate analysis of variance was performed using the *adonis* function. This partitions distance matrices between sources of variance and then uses a permutational approach to determine significance (15). The resulting ANOVA was judged highly significant with  $P < 0.001$  and 25.5% of the variance in the community structure explained by the environmental stage groupings.

Species (i.e., OTUs) with significant, nonrandom association with sediment samples were identified using the Indicator Species Analysis (ISA) tool in PC-ORD version 5.0. This analysis determines the constancy or faithfulness of species to a group by weighted averaging, which is the product of the relative abundance multiplied by relative frequency, times 100. In this way each species is given an importance value (IV), and indicator species for each group or cluster are those with the highest absolute value of IV (16). Significance was tested with a nonparametric procedure involving the Monte-Carlo permutation procedure in PC-ORD.

Neighbor-Joining bootstrap trees (1000 iterations) were made using the CLC Main Workbench 6.0 software package (CLC Bio, Cambridge, MA) for the majority of the 150 OTUs that according to ISA showed a significant response ( $P < 0.05$ ) to Deglacial and Holocene environmental changes in the Black Sea (i.e., those affiliated with cercozoans, chlorophytes, dinoflagellates, fungi, and stramenopiles). No trees were made for the few additional OTUs associated with other phyla.

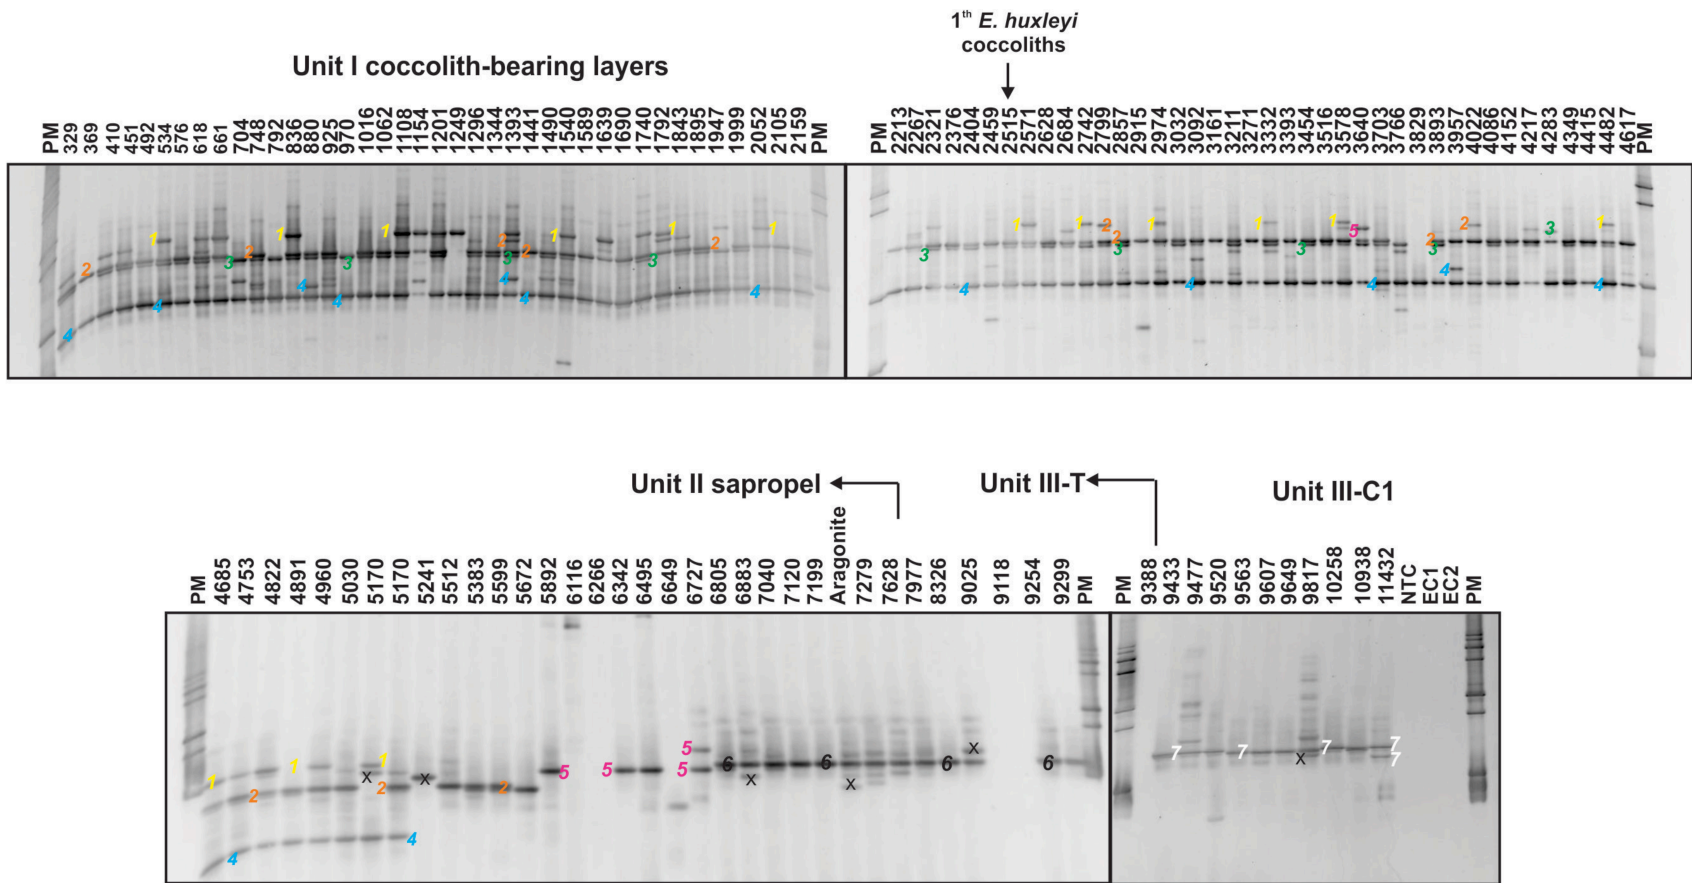

**Supporting Figure S1.** DGGE analysis of PCR-amplified fossil Copepod 18S rDNA. In total, 69 DGGE bands were excised and sequenced. Bands melting at the same vertical position, and occasionally also bands at different vertical positions, represented identical sequences. As a result, the 69 bands comprised only seven unique (i.e., color coded) OTUs and are numbered 1-7 in the gel. A cross indicates low quality sequence. The calendar age in years BP of each analyzed interval is denoted above the gels as well as the different sediment types (Unit III-C1, Unit III-T, Unit II sapropel and Unit I coccolith-bearing layers). The first *E. huxleyi* coccoliths occurred at 2515 a cal BP. PM (position marker, not a sample). PCR controls: NTC (no template control; control for contamination during pipetting of the PCR reactions), EC1 and EC2 (Extraction Controls; control for contamination during extraction).

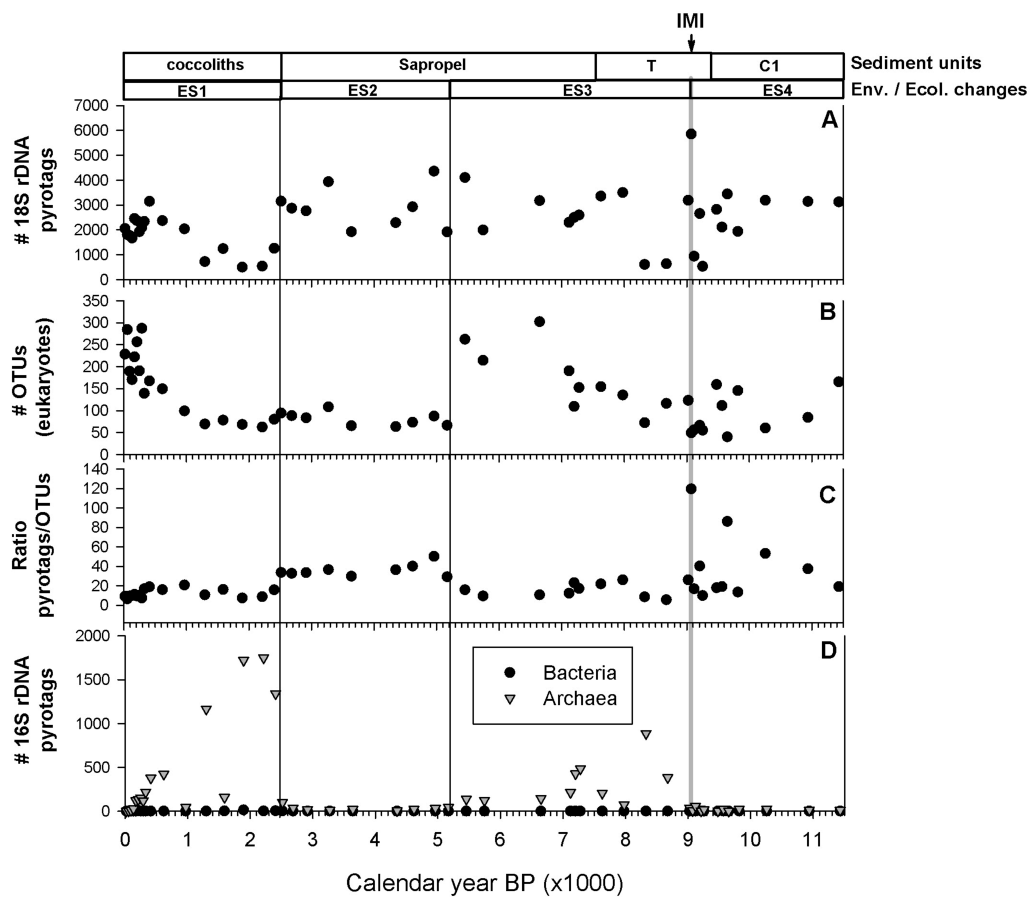

**Supporting Figure S2.** Distribution of SSU rDNA pyrotags and OTUs in the Black Sea record. (A) Number of high quality 18S rDNA pyrotags after PyroTagger analysis. (B) Number of eukaryotic OTUs in each sample. (C) Ratio between the number of 18S rDNA pyrotags and OTUs. (D) Number of bacterial and archaeal 16S rDNA OTUs in each sample. IMI: Previously published Initial Marine Inflow (17).

| Clone | NCBI         |                                |                           |           | Hit    |          | %        |
|-------|--------------|--------------------------------|---------------------------|-----------|--------|----------|----------|
| DGGE_ | closest Hit  | Description                    | Source/habitat            | E-value   | length | Identity | Identity |
| Cop7  | GU969142     | <i>Sinocalanus sinensis</i>    | River estuaries           | 1.78E-133 | 276    | 268      | 97.1     |
|       | GU969144     | <i>Sinocalanus tenellus</i>    | Brackish waters           | 4.34E-131 | 276    | 267      | 96.7     |
| Cop6  | AJ862482     | Clone DGGE band 4DB81          | Sulfurous freshwater lake | 3.88E-122 | 248    | 243      | 98       |
|       | AY339158-161 | <i>Skistodiatomus</i> spp.     | freshwater                | 2.47E-86  | 269    | 245      | 91       |
| Cop5  | GQ402489     | clone 27_BSA6S5Euk             | Black Sea surface waters  | 5.62E-152 | 275    | 275      | 100.0    |
|       | AY446901     | <i>Centropages hamatus</i>     | Black Sea                 | 8.14E-145 | 274    | 273      | 99.6     |
| Cop2  | GU433130     | clone BK316 18S                | German North Sea          | 3.60E-153 | 277    | 277      | 100.0    |
|       | JF326205     | <i>Paracalanus parvus</i>      | Black Sea                 | 4.32E-131 | 240    | 240      | 100.0    |
| Cop4  | GQ402478     | clone 16_BSA6S5Euk             | Black Sea suboxic zone    | 2.30E-154 | 279    | 279      | 100.0    |
|       | L81939       | <i>Calanus pacificus</i>       |                           | 2.30E-154 | 279    | 279      | 100.0    |
| Cop1  | AY331737     | clone mj223                    | Bay of Fundy              | 1.84E-136 | 276    | 269      | 97.5     |
|       | GU969142     | <i>Sinocalanus sinensis</i>    | River estuaries           | 7.27E-136 | 276    | 269      | 97.5     |
| Cop3  | AY446903     | <i>Pseudocalanus elongatus</i> | Black Sea                 | 2.30E-154 | 279    | 279      | 100.0    |
|       | GQ402474     | clone 12_BSA6S5Euk             | Black Sea surface waters  | 2.30E-154 | 279    | 279      | 100.0    |

**Supporting Table S2.** Top GenBank hits and corresponding metadata for seven copepod sequences recovered from up to 11.4 kyr-old sediments of GGC18. See Fig 1E for the relative abundance of these copepods. Shown here are the most similar sequences (% identity) of unnamed environmental clones and named copepod species available through GenBank as well as the origin of the most similar clones or the typical habitat of the most similar named species.

**Supporting Table S3 (pages 10-14).** General information about the 150 OTUs, which showed a statistically significant ( $p < 0.05$ ) response to Deglacial and Holocene environmental changes in the Black Sea. The table shows the OTU numbers (e.g. Pyrotagger Cluster 5; C5), a description of the NCBI nr closest hits and corresponding accession numbers and e-values as well as broad taxonomic information and in which taxonomic tree (Figs. S5 to S9) the phylogenetic position with similar sequences from the NCBI nr database can be viewed. The table furthermore shows the most likely habitat and origin of the OTUs (F; freshwater M; marine/coastal, T; terrestrial) and information revealed from the Indicator Species Analysis (ISA): Percentage of perfect indication in each of the four identified environmental stages. A Monte Carlo test of significance of observed maximum indicator values for species (1000 permutations) revealed Observed Indicator Values (IV), and IV values from randomized groups (mean and standard deviation) as well as p-values. Environmentally relevant OTUs ( $p < 0.05$ ) are color-coded for comparison with data shown in Fig. 2C of the main manuscript and Figs. S5-S9 and are ranked for highest relevance (highest IV values) per environmental group.

| OTU    | NCBI nr database closest hit (E-value)      |       | Accession | E-value   | Taxonomic /phylogenetic tree info |                  | Most likely origin | (E54) PFS | (E53) DFS-IMS | (E52) Most marine | (E51) Freshening | (IV) | Mean | S.Dev | P-value |
|--------|---------------------------------------------|-------|-----------|-----------|-----------------------------------|------------------|--------------------|-----------|---------------|-------------------|------------------|------|------|-------|---------|
| C5     | <i>Choricystis</i> sp. Pic8/18P-11w         | 100.0 | AY197629  | 1.00E-177 | Viridiplantae                     | Chlorophyta      | F                  | 95        | 3             | 0                 | 0                | 94.6 | 27.3 | 8.09  | 0.0002  |
| C57    | Uncult. freshwater eukaryote clone LG10-02  | 99.7  | AY919716  | 5.00E-141 | Alveolata                         | Dinophyceae      | F                  | 76        | 3             | 0                 | 0                | 76.3 | 20.9 | 7.91  | 0.0002  |
| C4429  | <i>Choricystis</i> sp. Pic8/18P-11w         | 94.2  | AY197629  | 2.00E-130 | Viridiplantae                     | Chlorophyta      | F                  | 64        | 0             | 0                 | 0                | 63.6 | 14.5 | 7.11  | 0.0002  |
| C2766  | <i>Chlorellaceae</i> sp. CCAP 283/3         | 99.1  | FM205844  | 6.00E-165 | Viridiplantae                     | Chlorophyta      | F                  | 62        | 0             | 0                 | 0                | 62.3 | 15.3 | 7.52  | 0.0002  |
| C19305 | Uncult. freshwater eukaryote clone LG10-02  | 96.2  | AY919716  | 3.00E-98  | Alveolata                         | Dinophyceae      | F                  | 45        | 0             | 0                 | 0                | 45.5 | 11.6 | 6.29  | 0.002   |
| C8620  | Uncult. freshwater eukaryote clone LG10-02  | 97.5  | AY919716  | 2.00E-119 | Alveolata                         | Dinophyceae      | F                  | 36        | 0             | 0                 | 0                | 36.4 | 10.3 | 5.91  | 0.0038  |
| C21790 | Uncult. Chlorophyta clone 3-6               | 97.1  | JF720727  | 3.00E-163 | Viridiplantae                     | Chlorophyta      | F                  | 33        | 1             | 0                 | 0                | 32.9 | 11.5 | 6.12  | 0.0088  |
| C5470  | Uncult. freshwater eukaryote clone LG10-02  | 95.6  | AY919716  | 5.00E-101 | Alveolata                         | Dinophyceae      | F                  | 31        | 3             | 0                 | 0                | 31.1 | 12.3 | 6.33  | 0.0156  |
| C6401  | <i>Choricystis</i> sp. AS-29                | 97.3  | AY195972  | 6.00E-160 | Viridiplantae                     | Chlorophyta      | F                  | 27        | 0             | 0                 | 0                | 27.3 | 9.4  | 5.67  | 0.0226  |
| C11004 | <i>Choricystis</i> sp. Pic8/18P-11w         | 96.2  | AY197629  | 1.00E-156 | Viridiplantae                     | Chlorophyta      | F                  | 27        | 0             | 0                 | 0                | 27.3 | 9.7  | 5.54  | 0.0208  |
| C24884 | <i>Choricystis</i> sp. Pic8/18P-11w         | 95.6  | AY197629  | 1.00E-152 | Viridiplantae                     | Chlorophyta      | F                  | 27        | 0             | 0                 | 0                | 27.3 | 9.6  | 5.51  | 0.0226  |
| C2738  | <i>Choricystis</i> sp. Pic8/18P-11w         | 95.0  | AY197629  | 8.00E-139 | Viridiplantae                     | Chlorophyta      | F                  | 27        | 0             | 0                 | 0                | 27.3 | 10.6 | 5.59  | 0.0244  |
| C10671 | <i>Prasiola calophylla</i> isolate Pcal1    | 97.0  | EF200521  | 8.00E-159 | Viridiplantae                     | Chlorophyta      | F                  | 27        | 0             | 0                 | 0                | 27.3 | 9.1  | 5.58  | 0.0224  |
| C21809 | Uncult. ascomycete clone 11-K17             | 99.1  | EU333022  | 2.00E-159 | Fungi                             | Dikarya          | T                  | 27        | 0             | 0                 | 0                | 27.3 | 9.3  | 5.65  | 0.0226  |
| C2649  | Uncult. eukaryote clone BLF-37euk-All-1-11d | 94.1  | GU970350  | 9.00E-109 | Metazoa                           | Chordata         | F                  | 27        | 0             | 0                 | 0                | 27.3 | 9.9  | 5.58  | 0.0226  |
| C161   | <i>Dreissena polymorpha</i>                 | 96.4  | AM774543  | 2.00E-130 | Metazoa                           | Mollusca         | F                  | 27        | 0             | 0                 | 0                | 27.3 | 9.3  | 5.67  | 0.0226  |
| C19176 | Uncult. eukaryote clone T08S1C3EukF5        | 97.1  | JF829194  | 1.00E-132 | Fungi                             | Dikarya          | T                  | 27        | 0             | 0                 | 0                | 27.3 | 9.5  | 5.61  | 0.022   |
| C4415  | Uncult. eukaryote DGGE gel band ms_dino1_44 | 96.7  | FJ797031  | 1.00E-156 | Alveolata                         | Dinophyceae      | M                  | 27        | 0             | 0                 | 0                | 27.3 | 10.6 | 5.62  | 0.0248  |
| C31906 | Uncult. freshwater eukaryote clone LG10-02  | 99.1  | AY919716  | 1.00E-137 | Alveolata                         | Dinophyceae      | F                  | 27        | 0             | 0                 | 0                | 27.3 | 9.3  | 5.61  | 0.0232  |
| C123   | <i>Monocystis agilis</i>                    | 93.2  | AF457127  | 2.00E-115 | Alveolata                         | Apicomplexa      | M                  | 27        | 0             | 0                 | 0                | 26.9 | 10.6 | 5.98  | 0.0272  |
| C147   | <i>Prasiola meridionalis</i> isolate Pmer1  | 97.9  | EF200528  | 2.00E-165 | Viridiplantae                     | Chlorophyta      | F                  | 26        | 0             | 0                 | 0                | 26.1 | 12.5 | 6.32  | 0.0364  |
| C15266 | Uncult. eukaryote DGGE gel band MS_euk3_34  | 97.9  | FJ785950  | 4.00E-162 | Viridiplantae                     | Streptophyta     | T                  | 25        | 1             | 0                 | 0                | 25   | 11.1 | 6.2   | 0.0266  |
| C990   | <i>Choricystis</i> sp. Pic8/18P-11w         | 96.5  | AY197629  | 6.00E-145 | Viridiplantae                     | Chlorophyta      | F                  | 25        | 0             | 0                 | 0                | 24.9 | 12.4 | 6.48  | 0.0368  |
| C28992 | <i>Choricystis</i> sp. AS-29                | 99.4  | AY195972  | 1.00E-172 | Viridiplantae                     | Chlorophyta      | F                  | 24        | 1             | 0                 | 0                | 24.3 | 10.5 | 5.91  | 0.0356  |
| C13559 | Uncult. fungus DGGE gel band 6              | 97.6  | FJ608611  | 5.00E-166 | Fungi                             | Dikarya          | T                  | 23        | 0             | 0                 | 1                | 23   | 10.1 | 5.62  | 0.039   |
| C17    | Uncult. marine clone BTPL20040810.0002      | 98.5  | FJ222082  | 6.00E-150 | Alveolata                         | Dinophyceae      | M                  | 0         | 87            | 1                 | 2                | 86.5 | 34   | 8.87  | 0.0002  |
| C32    | Uncult. marine clone ANT-Roth-MECL-23       | 99.4  | FJ985888  | 1.00E-142 | Cercozoa                          |                  | M                  | 2         | 86            | 0                 | 1                | 86.1 | 28.4 | 9.11  | 0.0002  |
| C42    | Uncult. eukaryote clone D4P08F09            | 92.7  | EF100333  | 3.00E-24  | Alveolata                         | Apicomplexa      | M                  | 1         | 80            | 0                 | 0                | 80.2 | 21.1 | 8.57  | 0.0002  |
| C68    | Uncult. eukaryote clone CK06-06_EK293       | 99.2  | AB521498  | 2.00E-115 | Stramenopiles                     | Bolidophyceae    | M                  | 0         | 72            | 1                 | 5                | 72   | 28.4 | 8.42  | 0.0002  |
| C21    | Uncult. eukaryote BS_DGGE_Euk-12a           | 99.7  | DQ234292  | 2.00E-169 | Alveolata                         | Dinophyceae      | M                  | 1         | 70            | 6                 | 15               | 69.6 | 35.4 | 6.56  | 0.0002  |
| C18    | <i>Pseudopedinella elastica</i>             | 100.0 | U14387    | 2.00E-160 | Stramenopiles                     | Dictyochophyceae | M                  | 6         | 69            | 2                 | 22               | 69.2 | 42.5 | 7.54  | 0.0002  |



|        |                                                 |       |          |           |               |                   |   |    |    |   |    |      |      |       |        |
|--------|-------------------------------------------------|-------|----------|-----------|---------------|-------------------|---|----|----|---|----|------|------|-------|--------|
| C28    | Uncult. eukaryote clone PF1E3H04                | 100.0 | HM226981 | 2.00E-124 | Stramenopiles | Labyrinthulida    | M | 1  | 67 | 0 | 8  | 66.6 | 25.7 | 7.45  | 0.0008 |
| C25    | <i>Nannochloropsis</i> sp. Tow 2/24 P-1w        | 100.0 | DQ977728 | 5.00E-176 | Stramenopiles | Eustigmatophyceae | F | 28 | 66 | 0 | 0  | 65.8 | 28.9 | 8.23  | 0.0014 |
| C17974 | <i>Gymnodinium microreticulatum</i>             | 98.5  | AB265965 | 5.00E-171 | Alveolata     | Dinophyceae       | M | 0  | 64 | 1 | 2  | 63.9 | 19.7 | 7.09  | 0.0004 |
| C372   | Uncult. eukaryote DGGE gel band MS_euk3_05      | 98.2  | FJ785969 | 1.00E-142 | Cercozoa      |                   | M | 0  | 64 | 4 | 0  | 63.9 | 21.9 | 7.95  | 0.0004 |
| C3498  | <i>Lepidodinium chlorophorum</i>                | 98.8  | AY331681 | 1.00E-172 | Alveolata     | Dinophyceae       | M | 0  | 62 | 0 | 0  | 61.7 | 15   | 7.06  | 0.0002 |
| C135   | Uncult. cercozoan 18S rRNA gene, clone B12      | 100.0 | FN263033 | 2.00E-144 | Cercozoa      |                   | M | 0  | 61 | 0 | 0  | 60.5 | 16.3 | 7.28  | 0.0002 |
| C8158  | <i>Gymnodinium catenatum</i> strain CCMP414     | 97.7  | DQ779990 | 1.00E-166 | Alveolata     | Dinophyceae       | M | 0  | 60 | 0 | 1  | 60.2 | 24   | 9.55  | 0.0022 |
| C19    | <i>Woloszynskia cincta</i> strain Nam Seon Kang | 100.0 | FR690459 | 8.00E-144 | Alveolata     | Dinophyceae       | M | 7  | 59 | 6 | 25 | 59.4 | 33.6 | 5.14  | 0.0002 |
| C7306  | <i>Gymnodinium catenatum</i> strain CCMP414     | 98.5  | DQ779990 | 5.00E-171 | Alveolata     | Dinophyceae       | M | 0  | 58 | 0 | 1  | 58.1 | 17.5 | 7.59  | 0.0002 |
| C269   | <i>Desmodesmus intermedius</i> CCAP 258/37      | 100.0 | FR865702 | 1.00E-176 | Viridiplantae | Chlorophyta       | F | 1  | 57 | 1 | 1  | 57.2 | 20.1 | 7.31  | 0.001  |
| C112   | <i>Gymnodinium</i> cf. nolleri                  | 100.0 | AB265963 | 5.00E-176 | Alveolata     | Dinophyceae       | M | 0  | 57 | 0 | 6  | 57   | 27.5 | 8.62  | 0.0064 |
| C1002  | Uncult. marine eukaryote clone SGB1-194         | 99.7  | JN418980 | 1.00E-137 | Cercozoa      |                   | M | 3  | 56 | 0 | 0  | 56.5 | 17   | 7.25  | 0.0004 |
| C13637 | <i>Woloszynskia cincta</i> strain Nam Seon Kang | 97.4  | FR690459 | 7.00E-130 | Alveolata     | Dinophyceae       | M | 1  | 56 | 1 | 9  | 56.1 | 22.1 | 6.69  | 0.001  |
| C149   | Uncult. eukaryote BS_DGGE_Euk-4                 | 100.0 | DQ234284 | 6.00E-155 | Cercozoa      |                   | M | 0  | 56 | 4 | 1  | 55.6 | 28   | 9.77  | 0.0148 |
| C173   | Uncult. eukaryote clone RS1E5G05                | 98.8  | HM228034 | 1.00E-136 | unclassified  |                   | M | 0  | 55 | 1 | 2  | 54.6 | 16.9 | 6.87  | 0.0006 |
| C17429 | <i>Gymnodinium catenatum</i> strain CCMP414     | 97.6  | DQ779990 | 2.00E-165 | Alveolata     | Dinophyceae       | M | 0  | 53 | 0 | 0  | 53.2 | 16   | 7.61  | 0.0006 |
| C22    | <i>Cochliobolus cynodontis</i> strain NBRC 9793 | 100.0 | JN941646 | 2.00E-179 | Fungi         | Dikarya           | T | 0  | 53 | 0 | 0  | 53.1 | 25.2 | 10.08 | 0.0138 |
| C56    | Uncult. eukaryote clone Pink_G08                | 93.6  | GQ483808 | 6.00E-135 | Alveolata     | Dinophyceae       | M | 0  | 52 | 0 | 1  | 51.9 | 20.4 | 8.17  | 0.0036 |
| C193   | Uncult. eukaryote clone MS605-58                | 97.6  | HM369676 | 1.00E-121 | Cercozoa      |                   | M | 0  | 52 | 2 | 9  | 51.8 | 30.7 | 9.43  | 0.0304 |
| C1473  | Uncult. eukaryote clone RF1E3A12                | 99.7  | HM227701 | 4.00E-152 | Cercozoa      |                   | M | 0  | 52 | 6 | 1  | 51.7 | 17.1 | 6.52  | 0.0006 |
| C151   | Uncult. marine eukaryote clone EF_Dino_08       | 97.1  | FJ210857 | 1.00E-161 | Alveolata     | Dinophyceae       | M | 1  | 51 | 0 | 2  | 50.6 | 22.1 | 8.3   | 0.0082 |
| C113   | Uncult. marine eukaryote isolate JPeuk-108      | 100.0 | AY145115 | 1.00E-121 | Fungi         | Dikarya           | T | 0  | 48 | 0 | 9  | 48.3 | 20.7 | 7.83  | 0.0068 |
| C24083 | <i>Equiselum robustum</i>                       | 96.8  | X78890   | 2.00E-160 | Viridiplantae | Streptophyta      | T | 8  | 46 | 0 | 0  | 45.6 | 17.3 | 7.47  | 0.0054 |
| C1136  | <i>Ophioglossum reticulatum</i>                 | 99.1  | AF313565 | 4.00E-162 | Viridiplantae | Streptophyta      | T | 0  | 45 | 0 | 0  | 45.5 | 12.2 | 6.55  | 0.0018 |
| C603   | Uncult. marine eukaryote clone NPK2_119         | 98.5  | EU371161 | 5.00E-146 | Cercozoa      |                   | M | 0  | 45 | 0 | 0  | 44.5 | 12.9 | 6.6   | 0.0026 |
| C581   | Uncult. marine picoeukaryote clone 1816H10      | 99.4  | FR874836 | 7.00E-105 | Alveolata     | Dinophyceae       | M | 0  | 44 | 0 | 0  | 44   | 15.7 | 7.59  | 0.0038 |
| C13    | <i>Nannochloris eucaryota</i>                   | 99.4  | AB080304 | 5.00E-176 | Viridiplantae | Chlorophyta       | M | 2  | 43 | 0 | 4  | 42.7 | 24.3 | 8.32  | 0.0344 |
| C250   | <i>Gregarina blattarum</i>                      | 95.8  | FJ459741 | 3.00E-44  | Alveolata     | Apicomplexa       | M | 1  | 39 | 0 | 2  | 39.3 | 18.5 | 7.77  | 0.0204 |
| C610   | <i>Gonyaulax cochlea</i> strain CCMP 1592       | 85.2  | AF274258 | 7.00E-80  | Alveolata     | Dinophyceae       | M | 0  | 39 | 0 | 2  | 39   | 18.6 | 8.1   | 0.0214 |
| C13489 | <i>Enallax acutiformis</i>                      | 97.9  | AB037089 | 1.00E-162 | Viridiplantae | Chlorophyta       | U | 0  | 36 | 0 | 0  | 36.4 | 10.1 | 5.81  | 0.0044 |
| C6725  | Uncult. eukaryote clone PF1EM2A12               | 95.0  | HM227181 | 2.00E-139 | Alveolata     | Dinophyceae       | M | 0  | 36 | 0 | 0  | 36.4 | 10.2 | 5.87  | 0.0046 |
| C6657  | Uncult. eukaryote DGGE gel band MS_euk3_05      | 97.9  | FJ785969 | 2.00E-149 | Cercozoa      |                   | M | 0  | 35 | 1 | 2  | 35.5 | 13.9 | 6.52  | 0.0138 |
| C3449  | <i>Gymnodinium microreticulatum</i>             | 95.0  | AB265965 | 5.00E-151 | Alveolata     | Dinophyceae       | M | 0  | 35 | 1 | 3  | 35.1 | 16   | 7.09  | 0.0196 |
| C3529  | Uncult. eukaryote clone PS1E4D02                | 100.0 | HM227361 | 4.00E-147 | Cercozoa      |                   | M | 0  | 33 | 0 | 9  | 33.2 | 16   | 6.66  | 0.0246 |
| C8488  | marine eukaryote clone BTPL20040810.0002        | 95.3  | FJ222082 | 8.00E-139 | Alveolata     | Dinophyceae       | M | 0  | 33 | 0 | 1  | 32.8 | 11   | 5.78  | 0.0056 |
| C3624  | <i>Nannochloropsis</i> sp. Tow 2/24 P-1w        | 96.2  | DQ977728 | 6.00E-155 | Stramenopiles | Eustigmatophyceae | F | 12 | 31 | 0 | 0  | 31   | 15.2 | 6.9   | 0.0296 |

|        |                                                |       |           |           |               |                  |   |    |    |    |    |      |      |       |        |
|--------|------------------------------------------------|-------|-----------|-----------|---------------|------------------|---|----|----|----|----|------|------|-------|--------|
| C8140  | Uncult. eukaryote clone PF1EM2A12              | 96.8  | HM227181  | 1.00E-142 | Alveolata     | Dinophyceae      | M | 0  | 30 | 0  | 1  | 30.2 | 11.1 | 5.75  | 0.0118 |
| C23486 | <i>Adiantum raddianum</i>                      | 94.2  | X78889    | 8.00E-134 | Viridiplantae | Streptophyta     | T | 0  | 27 | 0  | 0  | 27.3 | 9.5  | 5.58  | 0.0246 |
| C2984  | <i>Gymnodinium</i> cf. nolleri                 | 94.1  | AB265963  | 1.00E-147 | Alveolata     | Dinophyceae      | M | 0  | 27 | 0  | 0  | 27.3 | 9.9  | 5.44  | 0.021  |
| C17142 | clone 8_BSA6S5Euk                              | 94.1  | GQ402470  | 2.00E-149 | Alveolata     | Dinophyceae      | M | 0  | 27 | 0  | 0  | 27.3 | 9.1  | 5.52  | 0.0214 |
| C1438  | Uncult. eukaryote clone Elev_18S_5171          | 92.7  | EF025008  | 4.00E-97  | Alveolata     | Dinophyceae      | M | 0  | 27 | 0  | 0  | 27.3 | 9.6  | 5.61  | 0.0246 |
| C27013 | Uncult. eukaryote clone PF1EM2A12              | 93.3  | HM227181  | 5.00E-101 | Alveolata     | Dinophyceae      | M | 0  | 27 | 0  | 0  | 27.3 | 10.1 | 5.44  | 0.0194 |
| C5909  | Uncult. eukaryote clone PF1EM2A12              | 94.9  | HM227181  | 4.00E-87  | Alveolata     | Dinophyceae      | M | 0  | 27 | 0  | 0  | 27.3 | 9.6  | 5.62  | 0.0238 |
| C5390  | Uncult. eukaryote DGGE gel band ms_dino1_44    | 94.4  | FJ797031  | 8.00E-144 | Alveolata     | Dinophyceae      | M | 0  | 27 | 0  | 0  | 27.3 | 9.2  | 5.59  | 0.0218 |
| C9342  | Uncult. eukaryote DGGE gel band MS_euk3_34     | 96.8  | FJ785950  | 2.00E-159 | Viridiplantae | Streptophyta     | T | 0  | 27 | 0  | 0  | 27.3 | 10.8 | 5.62  | 0.0236 |
| C10657 | Uncult. eukaryote clone 01RLS110600093         | 97.1  | FN396512  | 5.00E-156 | Viridiplantae | Streptophyta     | T | 0  | 27 | 0  | 0  | 27.3 | 9.1  | 5.57  | 0.0236 |
| C12303 | marine eukaryote clone BTPL20040810.0002       | 97.7  | FJ222082  | 6.00E-145 | Alveolata     | Dinophyceae      | M | 0  | 27 | 0  | 0  | 27.3 | 10   | 5.54  | 0.0212 |
| C9575  | marine eukaryote clone BTQB20040603.0164       | 95.0  | FJ221680  | 1.00E-147 | Viridiplantae | Chlorophyta      | M | 0  | 27 | 0  | 0  | 27.3 | 9.2  | 5.54  | 0.021  |
| C5088  | <i>Warnowia</i> sp. BSL-2009a                  | 93.5  | FJ947040  | 2.00E-135 | Alveolata     | Dinophyceae      | M | 0  | 27 | 0  | 0  | 27.3 | 9.5  | 5.66  | 0.0246 |
| C3088  | Uncult. eukaryote clone CA-2-4-4h              | 97.6  | HQ999313  | 2.00E-150 | Viridiplantae | Streptophyta     | T | 0  | 26 | 0  | 0  | 25.6 | 11.8 | 6.21  | 0.0358 |
| C20941 | Uncult. eukaryote BS_DGGE_Euk-12a              | 97.6  | DQ234292  | 2.00E-159 | Alveolata     | Dinophyceae      | M | 0  | 25 | 8  | 0  | 25.3 | 12.7 | 6.46  | 0.0496 |
| C37488 | <i>Gymnodinium catenatum</i> strain CCMP414    | 98.2  | DQ779990  | 1.00E-167 | Alveolata     | Dinophyceae      | M | 0  | 24 | 1  | 0  | 24.4 | 11.8 | 6.27  | 0.0412 |
| C3355  | Uncult. alveolate clone PAG3AU2004             | 94.7  | DQ244019  | 1.00E-136 | Alveolata     | Dinophyceae      | M | 0  | 24 | 0  | 1  | 24.4 | 10.8 | 5.85  | 0.0372 |
| C14743 | <i>Pseudopedinella elastica</i>                | 96.5  | U14387    | 1.00E-142 | Stramenopiles | Dictyochophyceae | M | 0  | 24 | 0  | 1  | 24.3 | 10.7 | 5.87  | 0.0382 |
| C4449  | <i>Gyrodinium galatheanum</i> strain CCCM 555  | 92.7  | AF274262  | 2.00E-130 | Alveolata     | Dinophyceae      | F | 0  | 24 | 0  | 1  | 24.2 | 10.3 | 5.72  | 0.0326 |
| C4374  | Uncult. eukaryote clone Pink_G08               | 92.2  | GQ483808  | 2.00E-130 | Alveolata     | Dinophyceae      | M | 1  | 23 | 0  | 0  | 23.3 | 11.4 | 6.06  | 0.0444 |
| C9849  | marine eukaryote clone BTPL20040810.0002       | 95.6  | FJ222082  | 6.00E-150 | Alveolata     | Dinophyceae      | M | 1  | 23 | 0  | 0  | 23   | 10   | 5.73  | 0.0344 |
| C55    | Uncult. eukaryote clone 01RLS110600093         | 99.4  | FN396512  | 5.00E-171 | Viridiplantae | Streptophyta     | T | 0  | 2  | 55 | 3  | 54.8 | 32.7 | 11.26 | 0.0416 |
| C11    | <i>Geomyces destructans</i> isolate MmyotGER-1 | 100.0 | GU999983  | 5.00E-176 | Fungi         | Dikarya          | T | 6  | 11 | 54 | 14 | 54.1 | 33.4 | 6.87  | 0.0096 |
| C1     | <i>Tritarchium</i> sp. IAM 14522               | 100.0 | AB003951  | 2.00E-179 | Fungi         | Dikarya          | M | 12 | 2  | 54 | 5  | 53.6 | 33.5 | 8.01  | 0.02   |
| C17783 | <i>Engyodontium album</i> strain IHEM4198      | 98.8  | JF797223  | 4.00E-172 | Fungi         | Dikarya          | M | 0  | 0  | 53 | 2  | 52.9 | 15.4 | 6.68  | 0.0008 |
| C19963 | <i>Geomyces destructans</i> isolate MmyotGER-1 | 99.4  | GU999983  | 1.00E-172 | Fungi         | Dikarya          | T | 1  | 3  | 47 | 3  | 47.4 | 21.2 | 7.64  | 0.0086 |
| C4104  | <i>Chamaeleomyces granulomatis</i> UAMH 11028  | 96.7  | HM635076  | 1.00E-161 | Fungi         | Dikarya          | T | 0  | 0  | 47 | 8  | 46.6 | 17.3 | 7.08  | 0.0042 |
| C2429  | <i>Engyodontium album</i> strain IHEM4198      | 97.6  | JF797223  | 3.00E-163 | Fungi         | Dikarya          | T | 0  | 0  | 39 | 5  | 38.8 | 13.6 | 6.27  | 0.0052 |
| C29329 | <i>Engyodontium album</i> strain IHEM4198      | 99.4  | JF797223  | 5.00E-176 | Fungi         | Dikarya          | T | 0  | 1  | 38 | 1  | 38   | 12.2 | 6.29  | 0.0052 |
| C3657  | <i>Paecilomyces hepiali</i> strain SJL0909     | 99.7  | HM135172  | 5.00E-171 | Fungi         | Dikarya          | T | 0  | 0  | 38 | 0  | 37.5 | 11.5 | 5.39  | 0.0024 |
| C7461  | DGGE gel band ms_dino1_35                      | 94.2  | FJ797027  | 1.00E-106 | Alveolata     | Dinophyceae      | M | 0  | 0  | 38 | 0  | 37.5 | 9.2  | 5.45  | 0.0036 |
| C9712  | <i>Westerdykella cylindrica</i> ATCC 24077     | 97.6  | NG_016502 | 8.00E-164 | Fungi         | Dikarya          | T | 1  | 0  | 30 | 2  | 29.7 | 12.7 | 6.48  | 0.0318 |
| C38835 | <i>Geomyces destructans</i> isolate MmyotGER-1 | 98.8  | GU999983  | 8.00E-169 | Fungi         | Dikarya          | T | 0  | 0  | 25 | 0  | 25   | 8.7  | 4.74  | 0.0276 |
| C796   | <i>Sancassania polyphyllae</i> clone MPJ-B6-9  | 97.9  | JN166429  | 4.00E-157 | Metazoa       | Arthropoda       | M | 0  | 0  | 25 | 0  | 25   | 8.5  | 4.47  | 0.021  |
| C21988 | Uncult. eukaryote BS_DGGE_Euk-10               | 97.0  | DQ234290  | 1.00E-132 | Alveolata     | Dinophyceae      | M | 0  | 0  | 25 | 0  | 25   | 8.6  | 4.52  | 0.0224 |

|        |                                                |       |          |           |               |                 |   |   |    |    |    |      |      |      |        |
|--------|------------------------------------------------|-------|----------|-----------|---------------|-----------------|---|---|----|----|----|------|------|------|--------|
| C18216 | DGGE gel band ms_dino1_35                      | 100.3 | FJ797027 | 4.00E-97  | Viridiplantae | Streptophyta    | T | 0 | 0  | 25 | 0  | 25   | 9    | 4.71 | 0.0236 |
| C22131 | Uncult. fungus DGGE gel band B4                | 97.3  | JN020652 | 1.00E-161 | Fungi         | Dikarya         | T | 0 | 0  | 25 | 0  | 25   | 8.5  | 4.48 | 0.021  |
| C11038 | <i>Xenobotrytis acaducospora</i>               | 97.0  | EU541483 | 1.00E-152 | Fungi         | Dikarya         | T | 0 | 0  | 21 | 1  | 21.1 | 9.1  | 5.5  | 0.0398 |
| C2996  | Uncult. marine eukaryote clone UEPACBp4        | 99.4  | AY129045 | 3.00E-83  | Alveolata     | Dinophyceae     | M | 0 | 0  | 21 | 1  | 21   | 9.1  | 5.43 | 0.0394 |
| C142   | Uncult. eukaryote clone RS1E5F11               | 98.5  | HM228078 | 1.00E-86  | Alveolata     | Dinophyceae     | M | 0 | 1  | 0  | 84 | 84.4 | 24.5 | 7.26 | 0.0002 |
| C6823  | Uncult. eukaryote clone PF1EM2A12              | 96.4  | HM227181 | 8.00E-144 | Alveolata     | Dinophyceae     | M | 0 | 0  | 14 | 77 | 77   | 23.9 | 6.68 | 0.0002 |
| C59    | clone 20_BSA6S5Euk                             | 100.0 | GQ402482 | 4.00E-87  | Alveolata     | Dinophyceae     | M | 0 | 0  | 0  | 76 | 76.2 | 25.8 | 9.32 | 0.0004 |
| C37    | <i>Chaetoceros neogracile</i> strain AnM0002   | 87.0  | EU090012 | 9.00E-104 | Stramenopiles | Bacillariophyta | M | 0 | 0  | 0  | 75 | 75.5 | 22   | 7.76 | 0.0002 |
| C34    | clone 19_BSA6S5Euk                             | 100.0 | GQ402481 | 2.00E-120 | Unclassified  |                 | M | 0 | 5  | 1  | 75 | 74.6 | 31.1 | 9.32 | 0.0004 |
| C16    | Uncult. eukaryote DGGE gel band MS_euk3_09     | 100.0 | FJ785965 | 8.00E-129 | Alveolata     | Dinophyceae     | M | 0 | 1  | 12 | 63 | 63.4 | 27.5 | 7.77 | 0.0008 |
| C94    | Uncult. alveolate clone 29aD38                 | 100.0 | HM769621 | 2.00E-115 | Alveolata     | Dinophyceae     | M | 0 | 1  | 0  | 63 | 63.1 | 22.5 | 7.62 | 0.0002 |
| C95    | <i>Skeletonema grethae</i> CCAP 1077/4         | 100.0 | FR865520 | 2.00E-179 | Stramenopiles | Bacillariophyta | M | 0 | 2  | 3  | 53 | 52.9 | 22.1 | 8.16 | 0.0032 |
| C131   | DGGE gel band ms_dino1_39                      | 100.0 | FJ797030 | 6.00E-160 | Alveolata     | Dinophyceae     | M | 0 | 8  | 10 | 52 | 52.4 | 24.5 | 7.06 | 0.0042 |
| C5224  | <i>Pentapharsodinium tyrrhenicum</i> Geob*230  | 99.1  | HQ845329 | 1.00E-172 | Alveolata     | Dinophyceae     | M | 0 | 4  | 0  | 52 | 52.2 | 18   | 6.7  | 0.0014 |
| C49    | <i>Scrippsiella trochoidea</i> strain CCMP2271 | 100.0 | HM483396 | 5.00E-176 | Alveolata     | Dinophyceae     | M | 9 | 19 | 3  | 51 | 50.6 | 32.1 | 6.21 | 0.0102 |
| C274   | clone 25_BSA6S5Euk                             | 100.0 | GQ402487 | 4.00E-117 | Alveolata     | Dinophyceae     | M | 0 | 1  | 2  | 50 | 49.8 | 18.5 | 7.12 | 0.0022 |
| C80    | Uncult. stramenopile clone LC109.60            | 99.1  | EU143916 | 4.00E-172 | Stramenopiles | Chrysophyceae   | T | 0 | 0  | 0  | 49 | 49.3 | 16.5 | 7.36 | 0.0022 |
| C146   | Uncult. marine picoeukaryote clone 1816F11     | 100.0 | FR874821 | 7.00E-115 | Alveolata     | Dinophyceae     | M | 0 | 3  | 0  | 49 | 48.7 | 17.4 | 6.78 | 0.0024 |
| C20    | DGGE gel band ms_dino1_35                      | 100.0 | FJ797027 | 4.00E-132 | Alveolata     | Dinophyceae     | M | 0 | 6  | 45 | 48 | 47.7 | 31.2 | 5.81 | 0.0122 |
| C152   | <i>Detonula confervacea</i> strain CCMP353     | 100.0 | HQ912617 | 2.00E-179 | Stramenopiles | Bacillariophyta | M | 0 | 1  | 0  | 47 | 46.8 | 15.9 | 6.52 | 0.0018 |
| C4305  | <i>Peridinium wierzejskii</i>                  | 97.1  | AY443018 | 1.00E-162 | Alveolata     | Dinophyceae     | F | 0 | 3  | 1  | 46 | 46.2 | 17.6 | 6.42 | 0.002  |
| C2800  | Uncult. eukaryote clone JLRE-14-4              | 99.7  | JF260907 | 2.00E-124 | Alveolata     | Dinophyceae     | M | 0 | 0  | 0  | 44 | 44.4 | 14.8 | 7.02 | 0.0024 |
| C411   | Uncult. eukaryotic picoplankton clone BK472    | 95.9  | GU433155 | 2.00E-110 | Alveolata     | Dinophyceae     | M | 0 | 0  | 0  | 44 | 44.4 | 14.7 | 7.02 | 0.0022 |
| C19548 | clone SHAA470                                  | 96.2  | JQ226412 | 8.00E-164 | Alveolata     | Dinophyceae     | M | 0 | 0  | 0  | 44 | 44.4 | 13.7 | 6.33 | 0.0014 |
| C537   | Uncult. stramenopile clone 3-E8                | 100.0 | FN690609 | 3.00E-128 | Stramenopiles | Bacillariophyta | M | 0 | 0  | 0  | 43 | 42.9 | 15.5 | 7.13 | 0.0044 |
| C347   | <i>Chaetoceros</i> sp. ArM0005                 | 100.0 | EU090014 | 5.00E-126 | Stramenopiles | Bacillariophyta | M | 0 | 0  | 0  | 39 | 38.9 | 13   | 6.26 | 0.004  |
| C1440  | <i>Protoperidinium claudicans</i>              | 88.9  | AB255833 | 5.00E-71  | Alveolata     | Dinophyceae     | M | 0 | 0  | 0  | 39 | 38.9 | 13   | 6.38 | 0.0064 |
| C182   | <i>Protoperidinium conicum</i>                 | 92.9  | AY443020 | 2.00E-71  | Alveolata     | Dinophyceae     | M | 0 | 0  | 0  | 39 | 38.9 | 14.3 | 7.24 | 0.0098 |
| C914   | Uncult. eukaryote clone BB01_97                | 99.4  | AY885046 | 5.00E-116 | Alveolata     | Dinophyceae     | M | 0 | 0  | 0  | 39 | 38.9 | 12.7 | 6.13 | 0.003  |
| C565   | Uncult. eukaryote clone NAMAko-15              | 96.4  | AB252755 | 3.00E-103 | Cercozoa      |                 | M | 0 | 1  | 7  | 37 | 37.3 | 17.9 | 6.66 | 0.015  |
| C18314 | <i>Pentapharsodinium</i> sp. CCMP771           | 97.6  | AF274270 | 5.00E-166 | Alveolata     | Dinophyceae     | M | 0 | 1  | 0  | 36 | 35.6 | 13.6 | 6.22 | 0.009  |
| C10579 | <i>Scrippsiella trochoidea</i> strain CCMP2271 | 99.1  | HM483396 | 5.00E-171 | Alveolata     | Dinophyceae     | M | 0 | 8  | 2  | 34 | 34.4 | 18.6 | 6.82 | 0.0326 |
| C1635  | <i>Phellia exlex</i>                           | 92.7  | JF832984 | 1.00E-137 | Fungi         | Glomeromycota   | T | 0 | 0  | 0  | 33 | 33.3 | 12.2 | 6.1  | 0.0076 |
| C1071  | Uncult. dinoflagellate clone CCA32             | 98.8  | AY179990 | 1.00E-131 | Viridiplantae | Streptophyta    | T | 0 | 0  | 0  | 33 | 33.3 | 12.2 | 6.18 | 0.007  |
| C44    | Uncult. marine picoeukaryote clone 1804G02     | 97.0  | FR874476 | 7.00E-120 | Cercozoa      |                 | M | 0 | 0  | 0  | 33 | 33.3 | 12.5 | 6.55 | 0.012  |

|        |                                                 |       |          |           |               |                |   |   |    |   |    |      |      |      |        |
|--------|-------------------------------------------------|-------|----------|-----------|---------------|----------------|---|---|----|---|----|------|------|------|--------|
| C2104  | Uncult. eukaryote clone CS618-90                | 95.3  | HM369645 | 1.00E-112 | Alveolata     | Dinophyceae    | M | 0 | 0  | 0 | 32 | 32.4 | 13   | 6.17 | 0.0116 |
| C4148  | Uncult. eukaryote DGGE gel band MS_euk3_09      | 97.1  | FJ785965 | 2.00E-85  | Alveolata     | Dinophyceae    | M | 0 | 0  | 6 | 29 | 29   | 14.5 | 6.52 | 0.0362 |
| C2197  | <i>Alexandrium lusitanicum</i> strain AL-1      | 98.5  | JF906999 | 1.00E-167 | Alveolata     | Dinophyceae    | M | 0 | 0  | 0 | 28 | 27.8 | 12   | 6.42 | 0.0352 |
| C1369  | <i>Calyptrosphaera</i> sp. LKM-2007-1           | 92.0  | AM490992 | 4.00E-132 | Haptophyceae  | Coccolithales  | M | 0 | 0  | 0 | 28 | 27.8 | 11.1 | 5.88 | 0.0314 |
| C6623  | Dinophyceae sp. Shepherd's Crook                | 98.8  | AY590479 | 6.00E-170 | Alveolata     | Dinophyceae    | F | 0 | 0  | 0 | 28 | 27.8 | 10.9 | 5.59 | 0.0218 |
| C366   | <i>Gonyaulax spinifera</i> CCAP 1118/2          | 88.5  | FR865625 | 2.00E-95  | Alveolata     | Dinophyceae    | M | 0 | 0  | 0 | 28 | 27.8 | 11.9 | 6.38 | 0.0288 |
| C1153  | <i>Pycnococcus provasolii</i> CCAP 913/8        | 99.7  | FR865764 | 4.00E-177 | Viridiplantae | Chlorophyta    | M | 0 | 0  | 0 | 28 | 27.8 | 11.8 | 6.31 | 0.0348 |
| C11448 | <i>Scrippsiella trochoidea</i> strain CCMP2271  | 98.5  | HM483396 | 2.00E-160 | Alveolata     | Dinophyceae    | M | 0 | 0  | 0 | 28 | 27.8 | 11.4 | 6.12 | 0.0288 |
| C1829  | Uncult. eukaryote clone BB01_97                 | 95.0  | AY885046 | 5.00E-116 | Alveolata     | Dinophyceae    | M | 0 | 0  | 0 | 28 | 27.8 | 11.4 | 6.06 | 0.026  |
| C1912  | Uncult. marine chrysophyte clone Biosope_T39.04 | 96.2  | FJ537317 | 2.00E-129 | Stramenopiles | Chrysophyceae  | M | 0 | 0  | 0 | 28 | 27.8 | 11.5 | 6.19 | 0.0298 |
| C1717  | <i>Pyramimonas olivaceae</i>                    | 97.9  | FN562442 | 1.00E-167 | Viridiplantae | Chlorophyta    | M | 0 | 0  | 0 | 28 | 27.8 | 11   | 5.72 | 0.0252 |
| C233   | <i>Emiliana huxleyi</i>                         | 100.0 | FM882214 | 2.00E-179 | Haptophyceae  | Isochrysidales | M | 0 | 10 | 3 | 27 | 27.3 | 10.3 | 5.56 | 0.0222 |
| C2422  | Uncult. marine cercozoan clone BIO2_A5          | 99.4  | FN598236 | 5.00E-141 | Cercozoa      |                | M | 0 | 0  | 0 | 27 | 26.5 | 12.3 | 6.17 | 0.0416 |

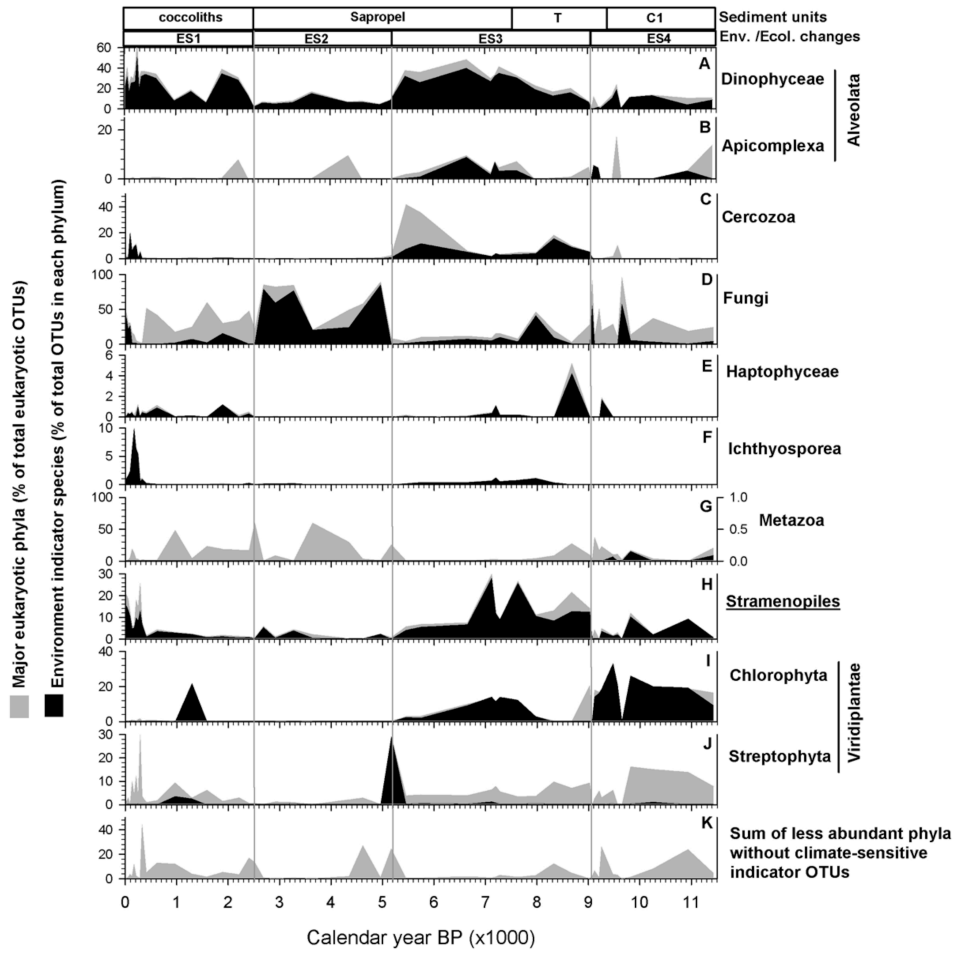

**Supporting Figure S3.** Normalized relative abundance of the predominant eukaryote phyla. The total percentage of pytotags grouping in the various phyla is shown in grey whereas the black surface areas represent the summed percentages of only statistically significant indicator species (i.e., from ISA analysis) for the different environmental stages. A higher taxonomic resolution of the underlined diverse stramenopiles is shown in Fig. S4.

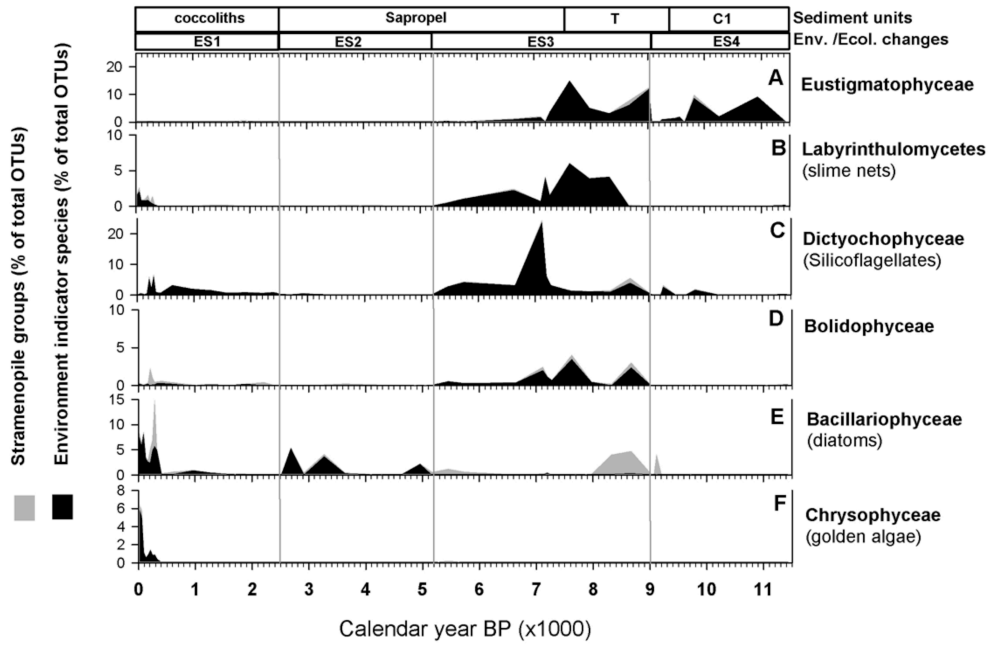

**Supporting Figure S4.** Normalized relative abundance of the major stramenopile groups. The total percentage of pytotags for each stramenopile group is shown in grey whereas the black surface areas represent the summed percentages of only statistically significant indicator species (i.e., from ISA analysis) for the different environmental stages.

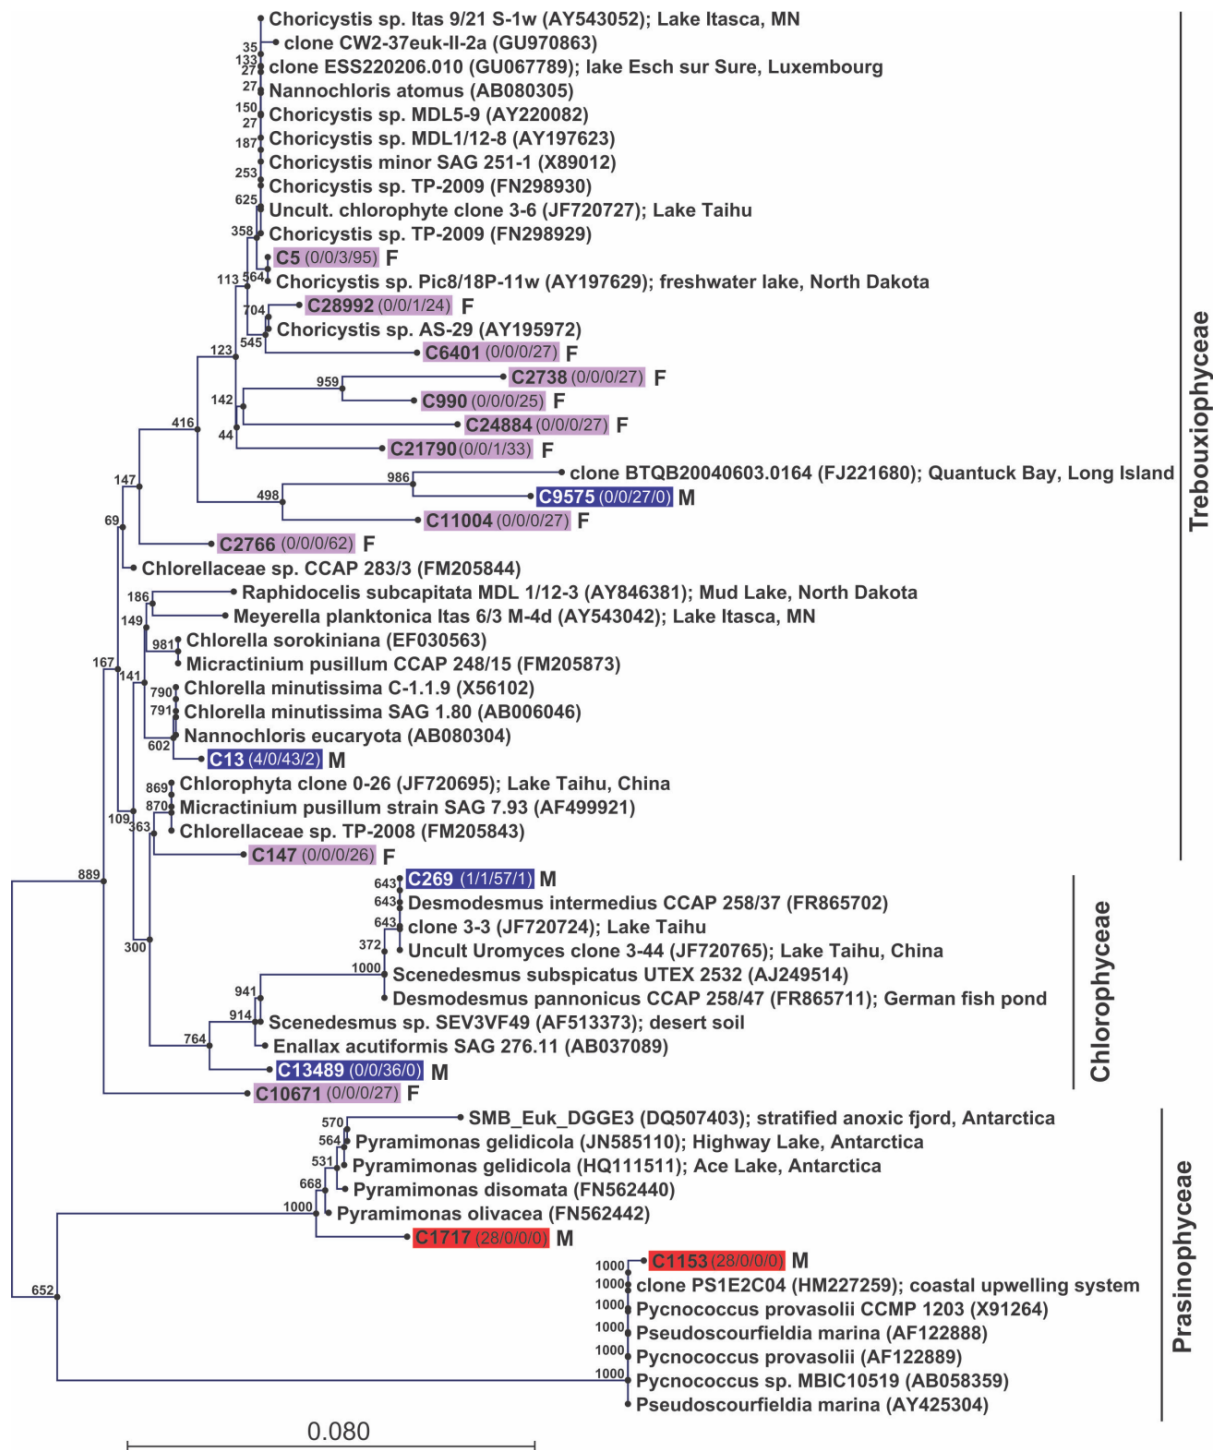

**Supporting Figure S5.** Neighbor Joining bootstrap tree with OTUs of past chlorophytes that represented statistically significant indicator species for the four environmental stages in the Black Sea as well as the most similar sequences available through GenBank. The percentage of perfect indication in ES 1-4 is depicted from Table S2 and listed in parenthesis next to each OTU. The maximum relevance of each OTU to an environmental stage is color coded as in Table S2. Listed is also the most likely origin of each OTU: F (freshwater), M (marine), T (terrestrial). The same



strategy was used for tree Figs S6 to S9 and will therefore not be repeated in the figure captions below.

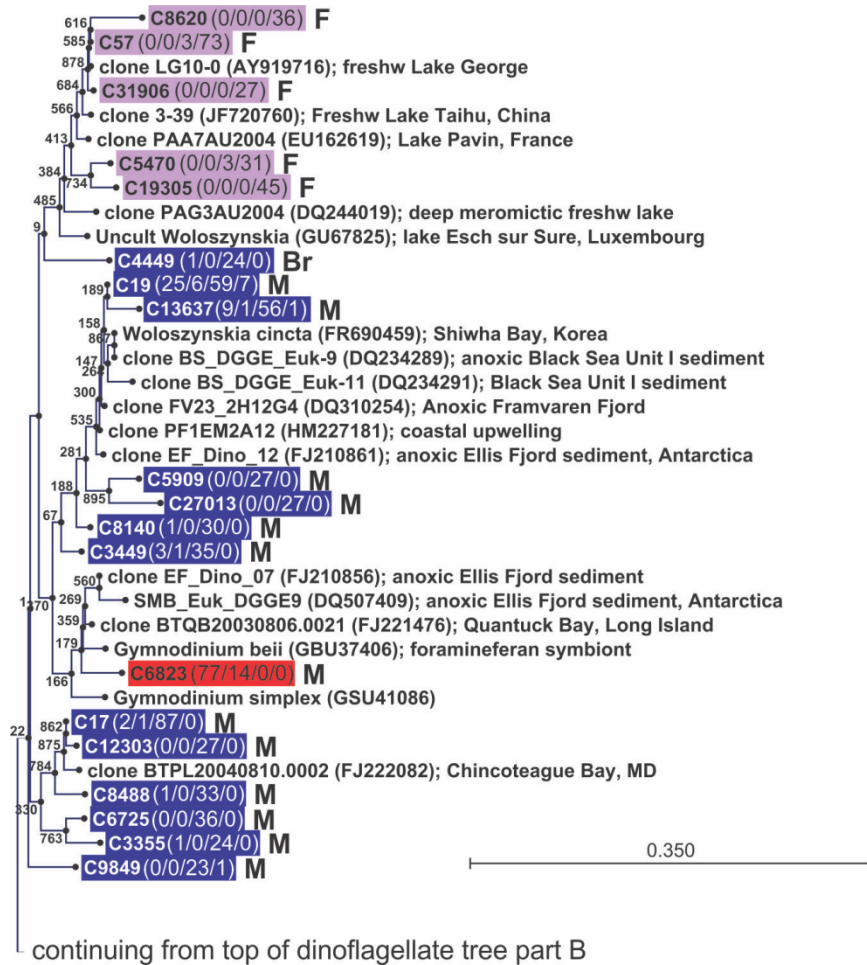

**Supporting Figure S6 (pages 18-20).** Neighbor Joining bootstrap tree with OTUs of past dinoflagellates that represented statistically significant indicator species for the four environmental stages in the Black Sea as well as the most similar sequences available through GenBank.



to bottom of dinoflagellate tree part C

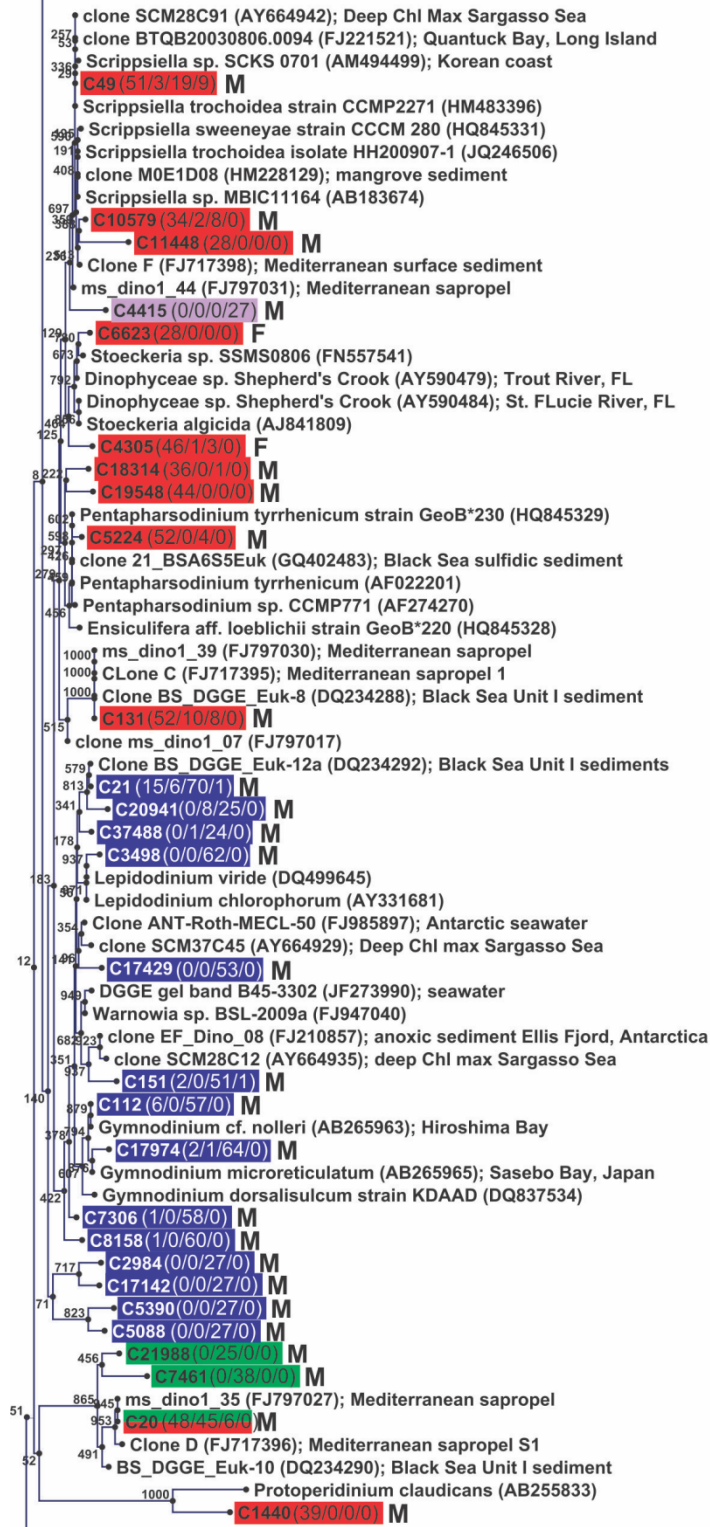

0.350

continuing from top of dinoflagellate tree part A

6B

to bottom of dinoflagellate tree part B

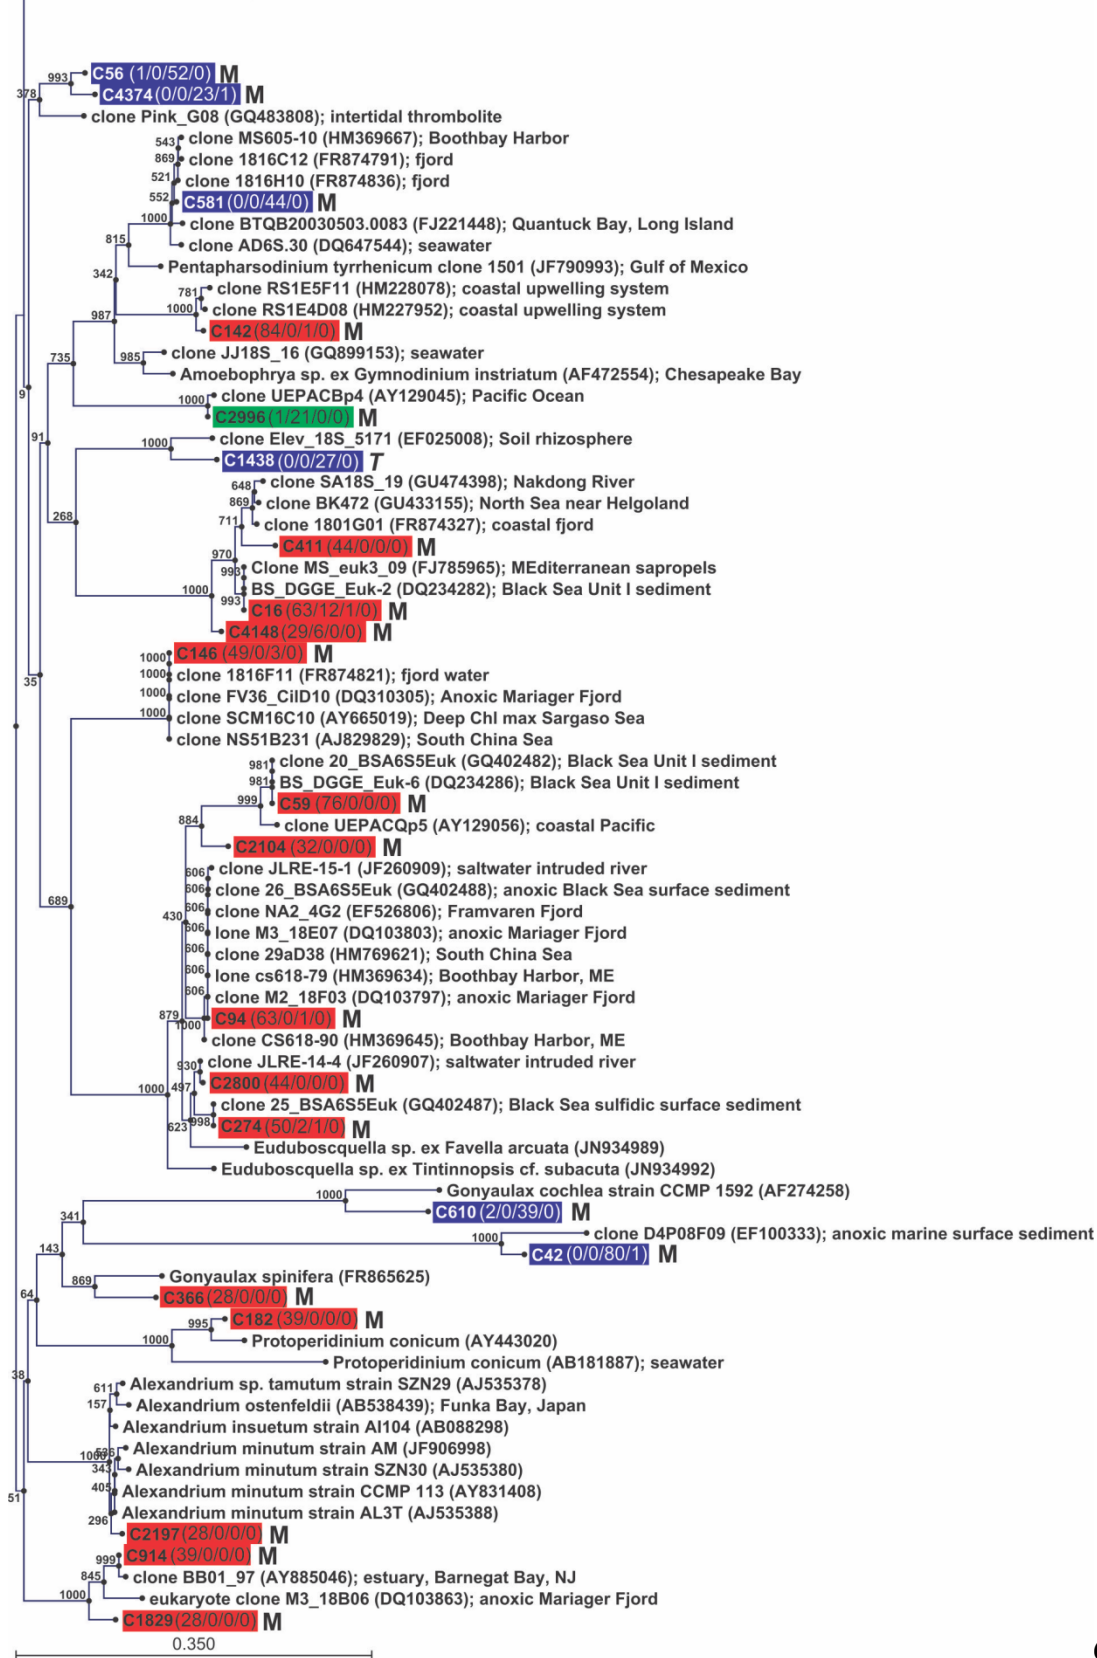

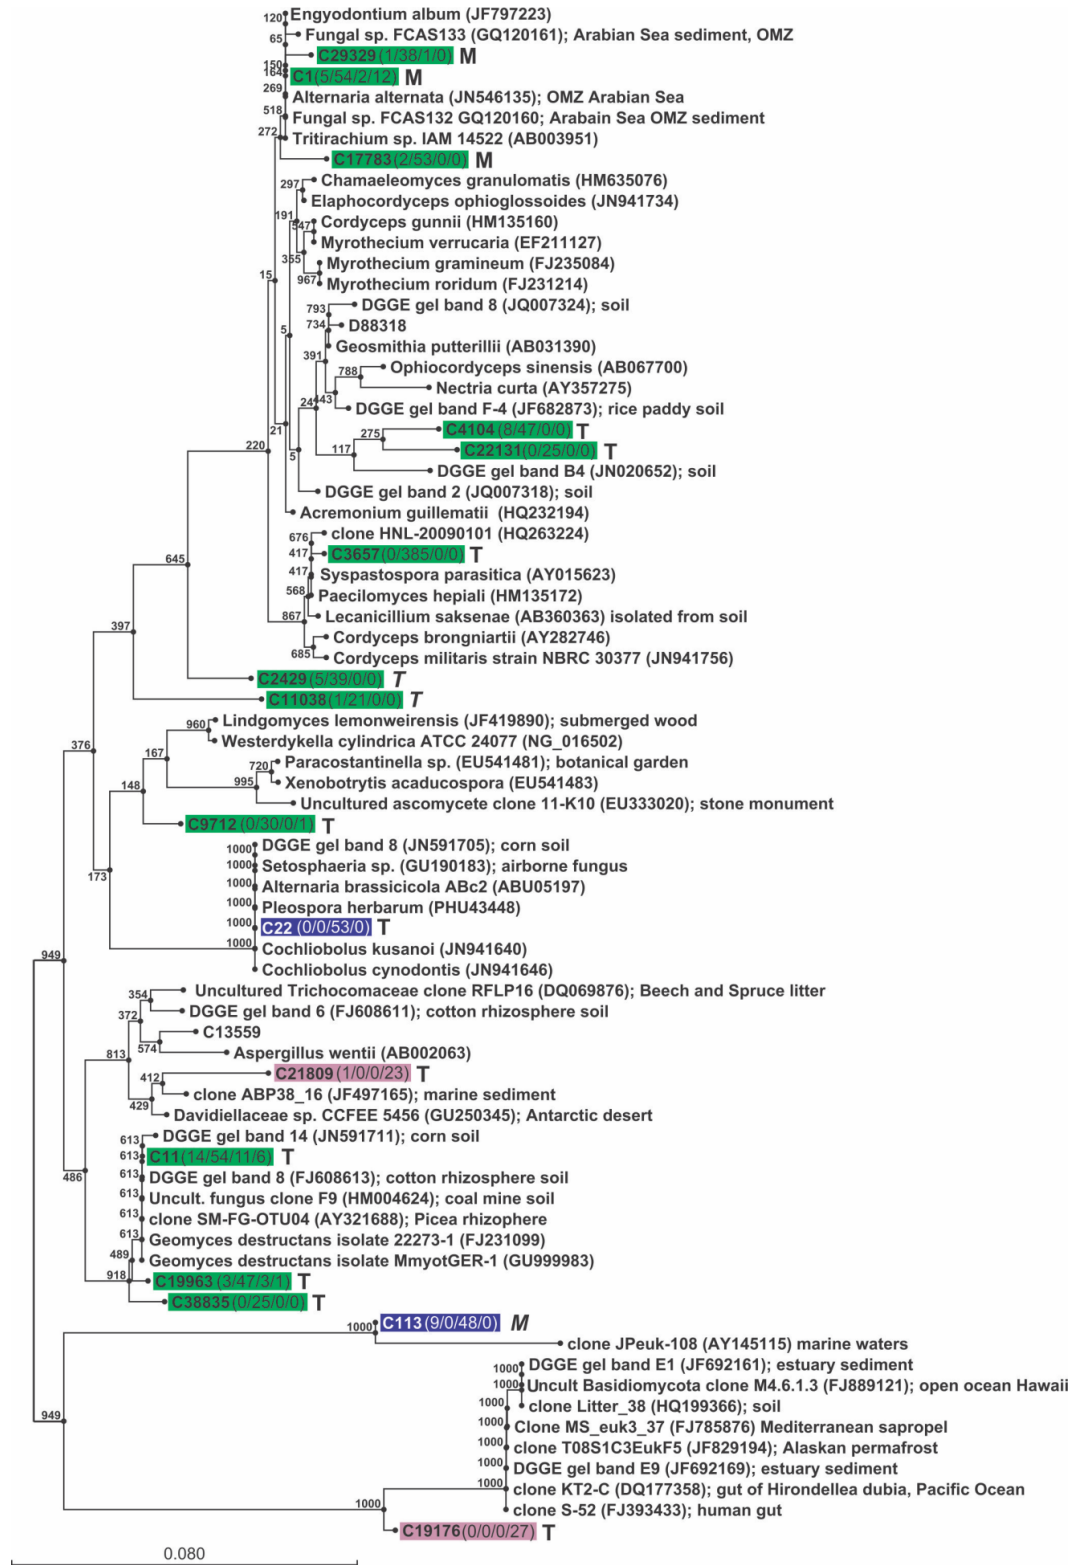

**Supporting Figure S7.** Neighbor Joining bootstrap tree with OTUs of fungi that represented statistically significant indicator species for the four environmental stages in the Black Sea as well as the most similar sequences available through GenBank.

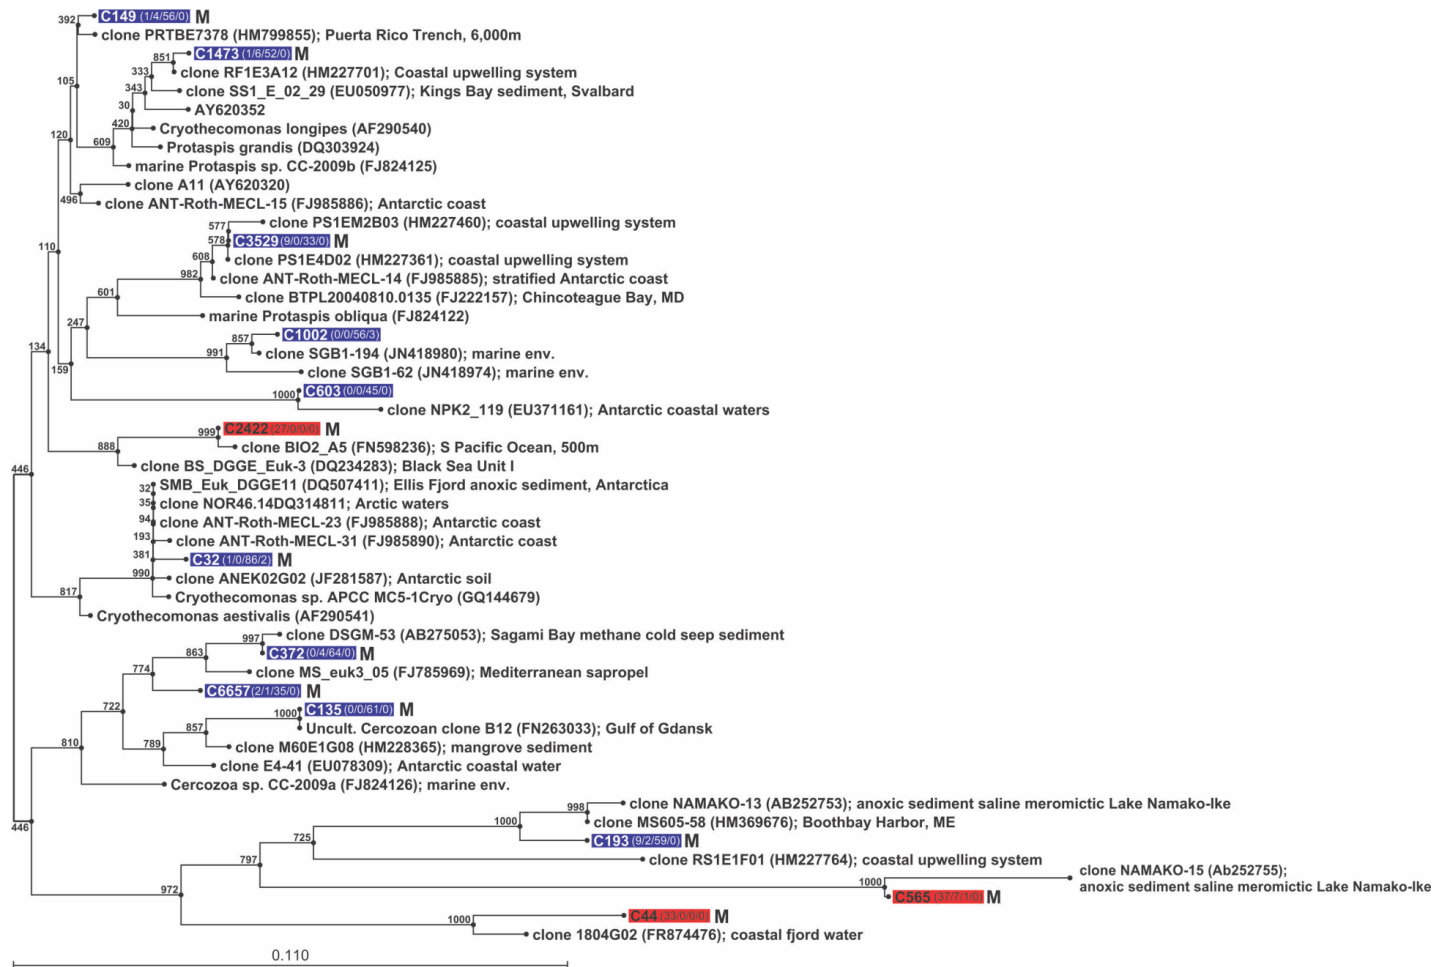

**Supporting Figure S8.** Neighbor Joining bootstrap tree with OTUs of past cercozoa that represented statistically significant indicator species for the four environmental stages in the Black Sea as well as the most similar sequences available through GenBank.



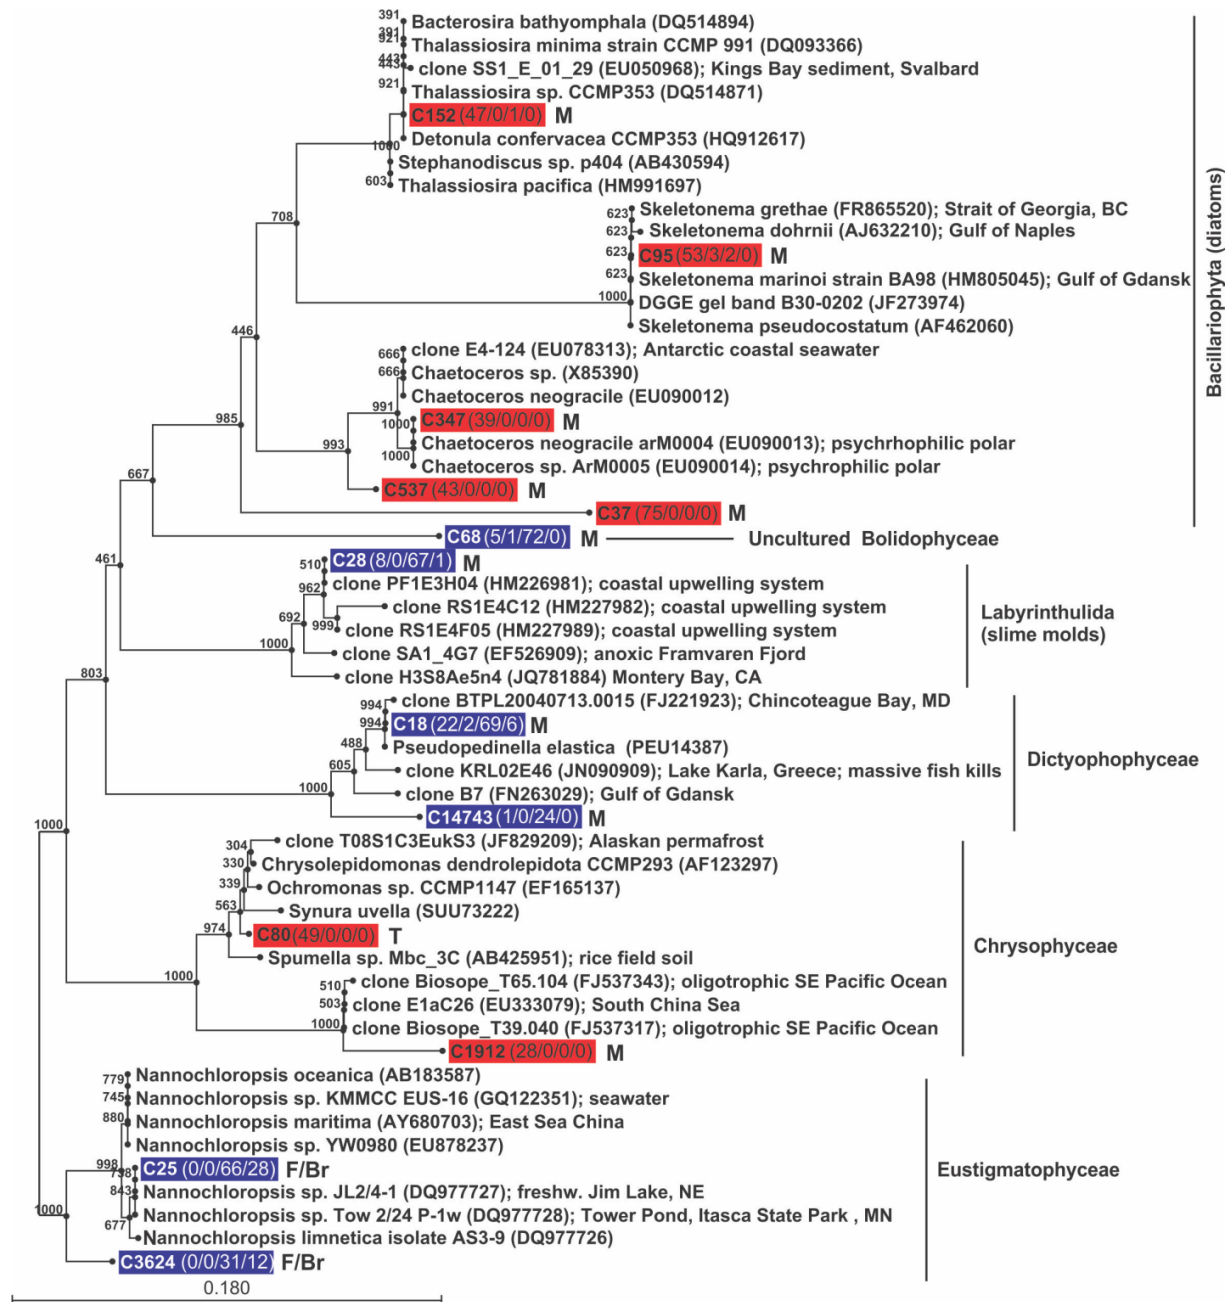

**Supporting Figure S9.** Neighbor joining bootstrap tree with OTUs of phototrophic (Bacillariophyta, Bolidophyceae, Dictyochophyceae, Chrysophyceae, Eustigmatophyceae) and heterotrophic (Labyrinthulida) stramenopiles that represented statistically significant indicator species for the four environmental stages in the Black Sea as well as the most similar sequences available through GenBank.

## References

1. Coolen MJL, *et al.* (2009) DNA and lipid molecular stratigraphic records of haptophyte succession in the Black Sea during the Holocene. *Earth and Planetary Science Letters* 284(3-4):610-621.
2. Coolen MJL (2011) 7000 years of *Emiliania huxleyi* viruses in the Black Sea. *Science* 333(6041):451-452.
3. Giosan L, Coolen, M. J. L., Kaplan, J. O., Constantinescu, S., Filip, F., Filipova-Marinova, M., Kettner, A., Thom., N. (2012) Early anthropogenic transformation of the Danube-Black Sea system. *Nature Scientific Reports*.
4. Soulet G, *et al.* (2011) Black Sea "Lake" reservoir age evolution since the Last Glacial - Hydrologic and climatic implications. *Earth and Planetary Science Letters* 308(1-2):245-258.
5. Amaral-Zettler LA, McCliment EA, Ducklow HW, & Huse SM (2009) A method for studying protistan diversity using massively parallel sequencing of V9 hypervariable regions of small-subunit ribosomal RNA genes. *Plos One* 4(7):e6372.
6. Margulies M, *et al.* (2005) Genome sequencing in microfabricated high-density picolitre reactors. *Nature* 437(7057):376-380.
7. Medlin L, Elwood HJ, Stickel S, & Sogin ML (1988) The characterization of enzymatically amplified eukaryotic 16S-like rRNA-coding regions. *Gene* 71(2):491-499.
8. Muyzer G, De Waal EC, & Uitterlinden AG (1993) Profiling of complex microbial populations by denaturing gradient gel electrophoresis analysis of polymerase chain reaction-amplified genes coding for 16S rRNA. *Applied and Environmental Microbiology* 59(3):695-700.
9. Pruesse E, *et al.* (2007) SILVA: a comprehensive online resource for quality checked and aligned ribosomal RNA sequence data compatible with ARB. *Nucleic Acids Research* 35:7188-7196.
10. Ludwig W, *et al.* (2004) ARB: a software environment for sequence data. *Nucleic Acids Research* 32(4):1363-1371.
11. Schloss PD, *et al.* (2009) Introducing mothur: Open-Source, Platform-Independent, Community-Supported Software for Describing and Comparing Microbial Communities. *Applied and Environmental Microbiology* 75(23):7537-7541.
12. Altschul SF, *et al.* (1997) Gapped BLAST and PSI-BLAST: a new generation of protein database search programs. *Nucleic Acids Research* 25(17):3389-3402.
13. Díez B, Pedrós-Alió C, Marsh TL, & Massana R (2001) Application of denaturing gradient gel electrophoresis (DGGE) to study the diversity of marine picoeukaryotic assemblages and comparison of DGGE with other molecular techniques. *Applied and Environmental Microbiology* 67(7):2942-2951.
14. Kunin V & Hugenholtz P (2010) PyroTagger: A fast, accurate pipeline for analysis of rRNA amplicon pyrosequence data. *The Open Journal* 1:1-9.
15. Anderson MJ (2001) A new method for non-parametric multivariate analysis of variance. *Austral Ecology* 26(1):32-46.
16. Everhart SE, Keller HW, & Ely JS (2008) Influence of bark pH on the occurrence and distribution of tree canopy myxomycete species. *Mycologia* 100(2):191-204.
17. Soulet G, Menot G, Lericolais G, & Bard E (2011) A revised calendar age for the last reconnection of the Black Sea to the global ocean. *Quaternary Science Reviews* 30(9-10):1019-1026.
